1 Article

# 2 Precision Autism: Genomic Stratification of Disorders Making 3 Up the Broad Spectrum May Demystify its “Epidemic Rates”

4 Elizabeth B Torres <sup>1,\*</sup>

5 <sup>1</sup> Rutgers the State University of New Jersey, Psychology Dept; ebtorres@psych.rutgers.edu

6 <sup>2</sup> Rutgers University Center for Biomedicine Imaging and Modeling, Computer Science Dept.

7 <sup>3</sup> Rutgers University Center for Cognitive Science

8 \* Correspondence: ebtorres@psych.rutgers.edu; Tel.: 1-848-445-8909

9  
10 **Abstract:** In the last decade, Autism has broadened and often shifted its diagnostics criteria, al-  
11 lowing several neuropsychiatric and neurological disorders of known etiology. This has resulted in  
12 a highly heterogeneous spectrum with apparent exponential rates in prevalence. I ask if it is possi-  
13 ble to leverage existing genetic information about those disorders making up Autism today and use  
14 it to stratify this spectrum. To that end, I combine genes linked to Autism in the SFARI database  
15 and genomic information from the DisGeNet portal on 25 diseases, inclusive of non-neurological  
16 ones. I use the GTEx data on genes’ expression on 54 human tissues and ask if there are overlap-  
17 ping genes across those associated to these diseases and those from SFARI-Autism. I find a com-  
18 pact set of genes across all brain-disorders which express highly in tissues fundamental for somat-  
19 ic-sensory-motor function, self-regulation, memory, and cognition. Then, I offer a new stratification  
20 that provides a distance-based orderly clustering into possible Autism subtypes, amenable to de-  
21 sign personalized targeted therapies within the framework of Precision Medicine. I conclude that  
22 viewing Autism through this physiological (Precision) lens, rather than viewing it exclusively from  
23 a psychological behavioral construct, may make it a more manageable condition and dispel the  
24 Autism epidemic myth.

**Citation:** Lastname, F.; Lastname, F.;  
Lastname, F. Title. *J. Pers. Med.* **2021**,  
11, x. <https://doi.org/10.3390/xxxxx>

Academic Editor: Firstname  
Lastname

Received: date

Accepted: date

Published: date

**Publisher’s Note:** MDPI stays neutral with regard to jurisdictional claims in published maps and institutional affiliations.

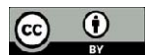

**Copyright:** © 2021 by the authors.  
Submitted for possible open access  
publication under the terms and  
conditions of the Creative Commons  
Attribution (CC BY) license  
(<https://creativecommons.org/licenses/by/4.0/>).

**Keywords:** Autism; genes; tissues; stratification; neurodevelopment; neurological disorders; neuropsychiatric disorders

## 1. Introduction

According to the CDC, in the span of 16 years, the US moved from 6.7/1000 to 18.5/1000 autistics in the population of school age children [1]. Reportedly, this increase continues to move along an exponential rate, while maintaining a near 5:1 males-to-females ratio [2, 3]. This ratio prevents researchers from spontaneously reaching statistical power in any random draw of the population, when attempting to characterize the autistic female phenotype. Yet, motor features derived from endogenous neural signals in motor patterns, do identify the female phenotype [4-7]. This is the case even when digitizing the current clinical criteria that would otherwise miss females because of exclusive reliance on external observation [8, 9]. Likewise, subtle cultural biases built into the social-appropriateness criteria of the current instruments skew identification of underserved populations [1]. Consequentially, current interventions are far from being inclusive, or advocating for neurodiversity in the clinical data driving best-practices and evidence-based criteria for treatment recommendation [10, 11].

Despite sparse sampling in certain sectors of society, the shifts in diagnostic criteria have significantly broadened the detection rates to include now children with sensory issues and to allow comorbidity with ADHD under the Diagnostic Statistical Manual

(DSM-5) [11]. This inclusion of ADHD in ASD contrasts with the former DSM-IV criteria, which would not allow comorbidities of ASD and ADHD, nor would it recognize sensory issues in Autism.

The challenges that broadening the diagnostics criteria bring to the science and practices of Autism are manifold [12], albeit discouragement by some clinicians from trying to stratify the spectrum into subtypes [13, 14]. Under current standards, motor, kinesthetic sensing, and vestibular issues are not part of the core symptoms of the original diagnosis in the DSM. These criteria also remain absent from psychological instruments like the ADOS test, currently used to diagnose different age groups [10, 15, 16]. However, kinesthetic sensing and motor/vestibular issues define several of the many disorders that today received the Autism diagnosis [17]. Among them are Cerebral Palsy [18, 19], Dystonia [20, 21], Tourette's Syndrome [22] and obsessive-compulsive disorders (OCD) thought to be related to ADHD [23]. Besides these neurological disorders in ASD [24], others of known genetic origins enter in the broad criteria for Autism. Among them, various types of Ataxias [25] and Fragile X [26, 27] make up for a large percentage of individuals with Autism today. Despite profound physiological, systemic alterations and somatic-sensory-motor differences, these individuals will very likely go on to receive blanket-style behavioral modification-treatments-for-all, during early interventions. Furthermore, these behavioral modification interventions in the US, will continue later at the school, through the individualized education plan. Such treatments neither recognize, nor address individual phenotypic physiological features of these disorders of known genetic origins that, nevertheless, do enter in the Autism spectrum today.

Phenotypically, these disorders that currently also go on to receive the Autism diagnosis, are precisely defined by somatic, sensory-motor issues [28, 29] that manifest throughout the lifespan [30]. Their definition in their fields of origin, is nevertheless at odds with the current clinical "gold standard" criteria. In the DSM-5 [11] we read "*Hyper- or hyporeactivity to sensory input or unusual interests in sensory aspects of the environment (e.g., apparent indifference to pain/temperature, adverse response to specific sounds or textures, excessive smelling or touching of objects, visual fascination with lights or movement).*" And in the DSM-5 criteria, motor issues are excluded owing to the confounds of symptoms induced by psychotropic medication, "*Medication-induced movement disorders are included in Section II because of their frequent importance in 1) the management by medication of mental disorders or other medical conditions and 2) the differential diagnosis of mental disorders (e.g., anxiety disorder versus neuroleptic-induced akathisia; malignant catatonia versus neuroleptic malignant syndrome). Although these movement disorders are labeled 'medication induced', it is often difficult to establish the causal relationship between medication exposure and the development of the movement disorder, especially because some of these movement disorders also occur in the absence of medication exposure. The conditions and problems listed in this chapter are not mental disorders.*" This neglecting of motor issues is enforced despite scientific evidence that even without medication, there are profound motor issues in Autism [5] that intensify with aging [30].

Further sidelining sensory-motor issues in Autism, within the ADOS booklet [10], under the guidelines for selecting a module, we read "*Note that the ADOS-2 was developed for and standardized using populations of children and adults without significant sensory and motor impairments. Standardized use of any ADOS-2 module presumes that the individual can walk independently and is free of visual or hearing impairments that could potentially interfere with use of the materials or participation in specific tasks.*"

Despite these caveats explicitly stated on their manuals, children with profound and highly visible motor, kinesthetic sensing and vestibular issues [31] go on to receive the Autism diagnosis that places them on a behavioral modification therapeutic pipeline that does not consider the brain-body physiology [32]. Clearly, there is a contradiction between the somatic-sensory-motor medical-physiological criteria and the social-appropriateness behavioral-psychological criteria explicitly denying the former. Which one is it? And why are these important medical-physiological factors deemed secondary or

99 *co-morbid, when they are at the core of the basic building blocks necessary to develop and main-*  
100 *social behaviors?*

101 To better understand this tension between psychological criteria (dominating Au-  
102 tism research, diagnostics, therapies and services) and medical-physiological issues re-  
103 ported by peer-reviewed science [33], I here examine the genes linked to these neurolog-  
104 ical and neuropsychiatric disorders making up a large portion of the autistic population  
105 today and manifesting profound somatic and sensory-motor differences.

106 I investigate the pool of genes linked to a purely behavioral diagnosis of Autism at-  
107 tained through instruments that precisely sideline the somatic sensory-motor physiology  
108 (*i.e.*, the ADOS/DSM-5). Specifically, the ADOS-2 research criteria inform the studies that  
109 support the confidence scores of the Autism-linked genes hosted by the Simons Founda-  
110 tion Research Initiative (SFARI). I leverage this research-based data repository of Au-  
111 tism-linked genes and use it as reference to compare its gene pool to the genes from oth-  
112 er sources identifying neurological and neuropsychiatric disorders making up the Au-  
113 tism spectrum today. Given that those other disorders of known genetic origin are visi-  
114 bly affected by somatic-sensory-motor differences, but also receive the Autism diagno-  
115 sis, I here ask if the gene pool of those disorders could help us stratify the broad spec-  
116 trum of Autism into subtypes.

117 Stratifying the broad spectrum of autism based on available genetic information,  
118 would help us advance at least two areas of intervention. At the non-drug intervention  
119 level, if we were to learn that a subtype of autism shares phenotypic characteristics with  
120 another disorder of the nervous system, we could repurpose treatments and accommo-  
121 dations working well in that other disorder and import them, adapting them to the au-  
122 tism subtype. In autism, we have a blanket treatment for all that is not working for  
123 many. This heterogeneous disorder with such homogeneous behavioral intervention has  
124 proven a poor model to aid neurodevelopment and is in fact stunting it. At the drug in-  
125 tervention level, we face a similar problem as we do with non-drug interventions. The  
126 broad heterogeneity that the current diagnostic criteria produce impedes tailoring inter-  
127 ventions appropriately to the responsive features of the person's nervous system. Sub-  
128 typing autism into different categories, each one with similar genomic make up, could  
129 help us repurpose drug research in a more targeted manner (as explained in Figure 1.)  
130 For example, if we were to target genes responsive to certain compounds and those  
131 compounds were to alleviate symptoms of a physiological ailment, then knowing that  
132 those responsive genes are present in both a subtype of autism and another disorder  
133 (*e.g.*, ataxia) for which such compounds may have started research, we could leverage  
134 that research, bring it to autism, and advance drug discovery for a particular cluster  
135 sharing genes responsive to the compound. It is the same human brain and body for all,  
136 whether one has an autism label or not. Why not repurpose the scientific advances led  
137 by physiology and medicine in other fields, instead of being informed and guided ex-  
138 clusively by rather subjective psychological criteria? [33]

139 I find that we can indeed automatically and categorically stratify Autism through  
140 the gene pool of neurological and neuropsychiatric disorders that make up its broad  
141 spectrum today. I discuss our results in the context of the Precision Medicine (PM) mod-  
142 el (Figure 1A) aimed at the development of personalized targeted treatments that inte-  
143 grate several layers of the knowledge network [34]. Under this PM platform I can better  
144 situate the person on the landscape of existing disorders for which there are more effec-  
145 tive treatments than those currently offered in Autism. Based on this genomic stratifica-  
146 tion of Autism, I here propose a paradigm shift whereby the pipeline of diagno-  
147 sis-to-treatment is based on the known physiology of these disorders (Figure 1B), ad-  
148 dressing specific capabilities, predispositions and needs of each neurological phenotype.  
149 This new line of scientific inquiry not only leverages existing genomic information but  
150 more importantly, it responds to the quest of the autistic community to improve the  
151 prognosis and the future lives of those who receive this diagnosis.

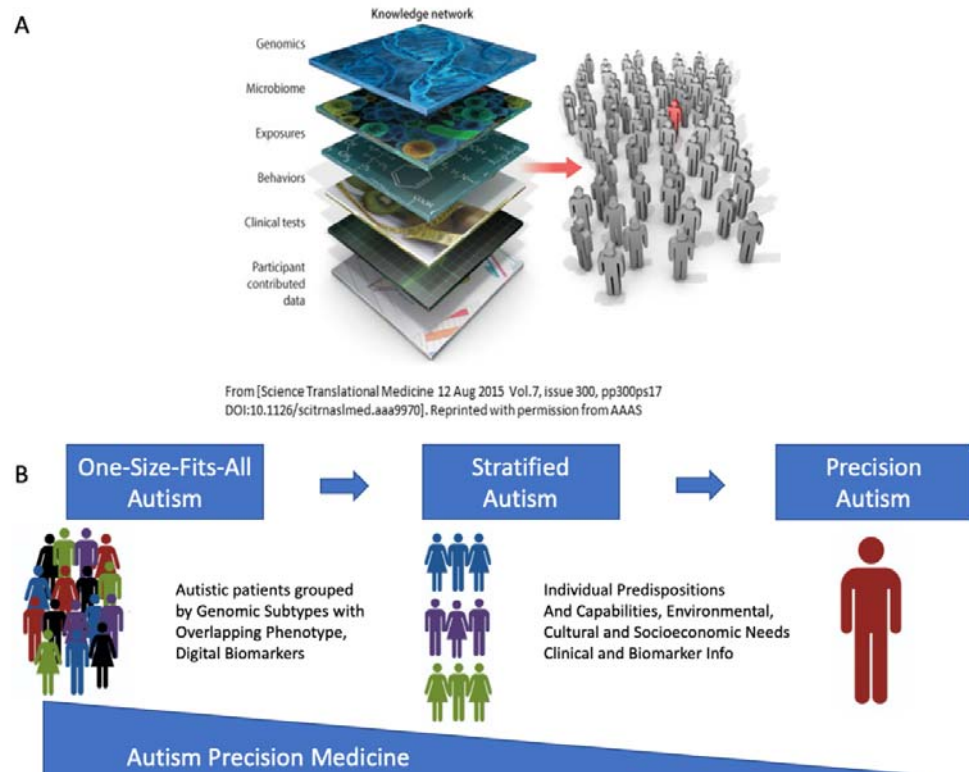

152

153

154

155

156

157

158

159

160

161

162

**Figure 1. Leveraging existing genomic data to stratify the broad Autism Spectrum.** (A) The Precision Medicine model [34] aims at the design of personalized targeted treatments that integrate all layers of the knowledge network to support the person's needs under the genetic and epigenetic individual makeup. (B) Proposed model to stratify the broad spectrum of Autism based on existing genomic information causally defining the origins of neurological and neuropsychiatric disorders making up Autism today. This Precision Autism model can identify, relative to other disorders of known origin, the person's best predispositions and capabilities, the environmental, cultural, and socio-economic needs, and design a personalized treatment that targets the medical-physiological issues rather than modifying behavior to conform to a grand average norm -a norm arbitrarily defined by current clinical criteria.

163

## 2. Materials and Methods

164

165

166

167

168

169

170

171

172

173

174

175

176

177

178

179

180

I examine the genetic data base from the Simons Foundation Research Initiative (SFARI), which has been scored according to the evidence provided in the scientific literature linking the behavioral Autism diagnosis with a pool of genes. I then extract from that set those genes that overlap with the pool of genes linked to other disorders that are fundamentally defined by somatic-sensory-motor issues. Among them I use the genes associated with cerebral palsy (CP), Dystonia, Attention Deficit Hyperactivity Disorder (ADHD), obsessive compulsive disorder (OCD), Tourette's, the Ataxias (autosomal dominant, recessive and X-linked) and Fragile X (FX). I also use the genes associated with Parkinson's disease (PD) [35, 36], as symptoms of Parkinsonism abound in autistic adults after 40 years of age [30, 37].

While the SFARI genes circularly depend on the ADOS and the DSM behavioral Autism criteria (*i.e.*, they were obtained precisely based on those clinical inventories describing *presumed* socially inappropriate behaviors), the latter genes come from the disease-association network (the DisGeNet portal) which did not rely on an Autism diagnosis. These individuals are likely to receive an Autism diagnosis at present, because of the shifts and broadening of the criteria [23, 24, 38-42]. However, they have their own clinical definition and known genetic origins [19, 43].

In Autism research, when the person has both diagnoses (ASD and a neurological or neuropsychiatric one) the former is coined idiopathic Autism, whereas the latter are called Autism of known etiology. Yet in a random draw of the population, we have identified clusters differentiating subtypes by relying on gait [6, 17, 44], voluntary reaches [4, 28, 45, 46] and involuntary head motions [5, 7, 30, 47, 48].

I blindly took these genes associated to other disorders of the nervous system (clinically and physiologically defined) and interrogated them in terms of their expression on brain and bodily tissues. I asked how much overlapping one would find (if any) with the SFARI Autism-linked genes (coined hereafter SFARI-Autism) defined by observation and descriptions of behaviors.

Upon this compilation of genes from several sources in the DisGeNet portal and the literature, I used the Genotype-Tissue Expression (GTEx) project involving human RNA-seq, expressed in Transcripts Per Million (TCM) to examine the genes' expression across the 54 tissues sampled in their database [49] (Figure 2A). Using this atlas of genetic regulatory effects across human tissues, I compare across diseases, for those genes overlapping with the SFARI Autism-linked genes, the common tissues where the expression of these genes is maximal. To zoom into these overlapping genes expressed on tissues from the GTEx project (Figure 2A), I included the 11 distinct brain regions along with other 7 tissues representative of three fundamental muscle types: cardiac, smooth, and skeletal (Figure 2B), supporting the generation and maintenance of all physiological processes underlying all human functions and behaviors. Specifically, brain tissues included: the amygdala, the anterior cingulate cortex, the basal ganglia (caudate, putamen, nucleus accumbens), the brain cortex and the brain frontal cortex, the cerebellum and the cerebellar hemisphere, the hippocampus, the hypothalamus, and the substantia nigra.

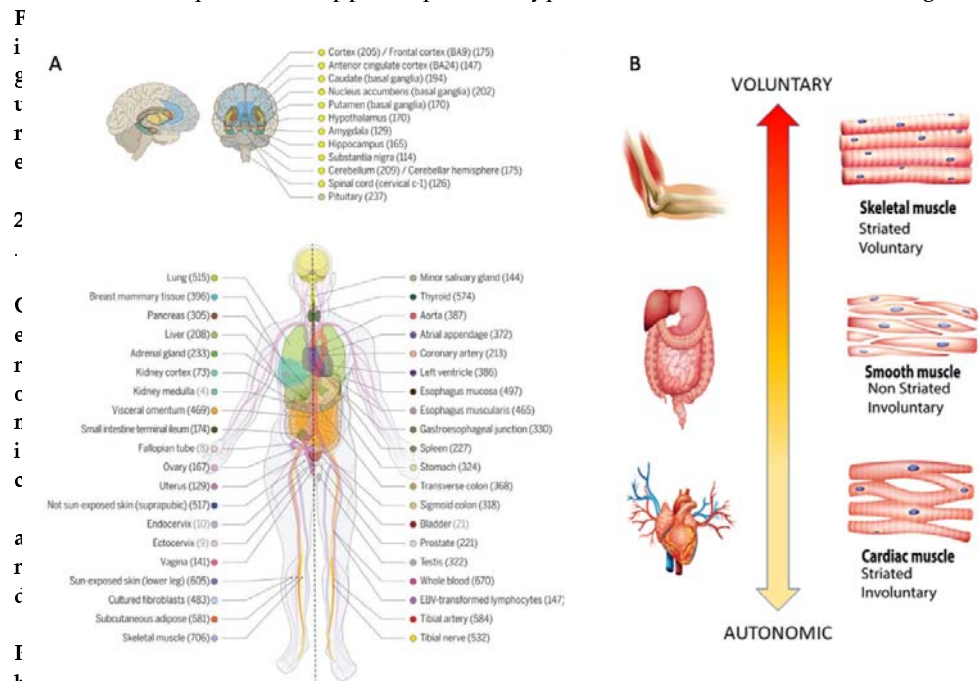

**biological criteria used in this study.** (A) GTEx v8 study atlas of 54 tissues including 11 distinct brain regions and two cell lines. Genotyped sample donors numbers in parenthesis and color coding to indicate the tissue in the adjacent circles (Figure used with permission from AAAS [49].) (B) Three fundamental types of muscles supporting autonomic, involuntary and voluntary actions in humans can help us categorize behavioral functional levels according to related tissues affected [25].

237 Representative tissues of the different muscle types are: (cardiac) the heart left ven-  
238 tricle and the heart atrial appendage, (smooth) the esophagus muscularis and the blad-  
239 der, (skeletal) muscle skeletal. Given their foundational role in all behavioral functions, I  
240 also examined these genes' expression on the tibial nerve and the spinal cord (Figure  
241 2A).

242  
243 The SFARI Autism categories that I used to determine the level of confidence that  
244 the gene is linked to Autism, were those reported as of 03-04-2020. Quoting from their  
245 site:

#### 246 CATEGORY 1

247 Genes in this category are all found on the SPARK gene list. Each of these genes has  
248 been clearly implicated in Autism Spectrum Disorders, ASD—typically by the presence  
249 of at least three de novo likely-gene-disrupting mutations being reported in the litera-  
250 ture—and such mutations identified in the sequencing of the SPARK cohort are typically  
251 returned to the participants. Some of these genes meet the most rigorous threshold of  
252 genome-wide significance; all at least meet a threshold false discovery rate of <0.1.

#### 253 CATEGORY 2

254 Genes with two reported de novo likely-gene-disrupting mutations.

255 A gene uniquely implicated by a genome-wide association study, either reaching  
256 genome-wide significance or, if not, consistently replicated and accompanied by evi-  
257 dence that the risk variant has a functional effect.

#### 258 CATEGORY 3

259 Genes with a single reported de novo likely-gene-disrupting mutation.

260 Evidence from a significant but unreplicated association study, or a series of rare  
261 inherited mutations for which there is not a rigorous statistical comparison with con-  
262 trols.

#### 263 SYNDROMIC (former category 4)

264 The syndromic category includes mutations that are associated with a substantial  
265 degree of increased risk and consistently linked to additional characteristics not required  
266 for an ASD diagnosis. If there is independent evidence implicating a gene in idiopathic  
267 ASD, it will be listed as “#S” (e.g., 2S, 3S). If there is no such independent evidence, the  
268 gene will be listed simply as “S”.

269 The GTEx dataset is as the 06-05-2017 v8 release [49]. For every gene in the disor-  
270 ders and diseases of interest, I first confirmed the presence of the gene in the GTEx da-  
271 taset and then incorporated it into the analyses. This was necessary to provide the tissue  
272 expression from GTEx.

273 The genes from the DisGeNet portal were found by interrogation of their dataset  
274 under disease type and saving the outcome to excel files containing all pertinent infor-  
275 mation.

276 I follow our previously proposed roadmap to adapt the Precision Medicine plat-  
277 form [34] to Autism research and treatments [50] linking other disorders to the broad  
278 Autism phenotype (Figure 1). I first isolate the genes common to Autism and each dis-  
279 order under consideration, sort them according to their median gene expression over the  
280 above mentioned 18 tissues of interest and then, for each tissue of interest, I highlight the  
281 top genes with expression above ( $\log(e^{60})$  TMP (using the natural logarithm, Euler's base  
282 2.7183), to further help visualize common top genes across these diseases. I note that this  
283 is an arbitrary threshold used only to help visualize the top genes, since other thresholds  
284 could be used to visualize more genes in common expressing on tissues of interest. I re-  
285 port in the supplementary material the *full* set of genes common to these disorders and  
286 the SFARI-Autism set. Then, for each of the 54 tissues, I obtain the gene in the unique  
287 intersection set with the maximal expression and plot this information for the brain tis-  
288 sues of interest along with the SFARI-Autism score assigned to that gene.

In addition to genes linked to neurological disorders, I examined genes linked to neuropsychiatric conditions such as depression, schizophrenia, ADHD, and post-traumatic stress syndrome (PTSD), the latter owing to the tendencies in ASD to develop trauma and depression reportedly induced by current behavioral therapies [51], and to the known overlap between Autism and schizophrenia [52]. Furthermore, since the DSM 5 now accepts ASD and ADHD as coexisting diagnoses, I included ADHD-linked genes and asked about their overlap with Autism. I also tallied the shared genes pairwise across all the neurological and neuropsychiatric disorders under consideration, to learn about shared genes across these diseases.

Finally, other non-neurological and non-neuropsychiatric diseases were considered, to ascertain their overlap with the Autism-linked genes and with the genes linked to the neurological and neuropsychiatric disorders. I tallied their genes in common and interrogated the genes' expression reported in the GTEx tissues. These included several forms of cancer (colon 49 genes, breast 488 genes, pancreas 114 genes), diabetes 5,545 genes, autoimmune disorders (lupus systemic 1,743 genes, psoriasis 1,221 genes, irritable bowel syndrome 1,483 genes), and congenital heart disease 252 genes, totaling 10,895 genes in addition to 10,028 genes associated to neural disorders (a random draw across 25 diseases of 20,923 genes and their expression on 54 tissues). Here I hypothesized that the overlap between the genes linked to Autism and those linked to neurological and neuropsychiatric conditions would be much higher than the overlap between the Autism-linked genes and the genes linked to other non-neurological diseases.

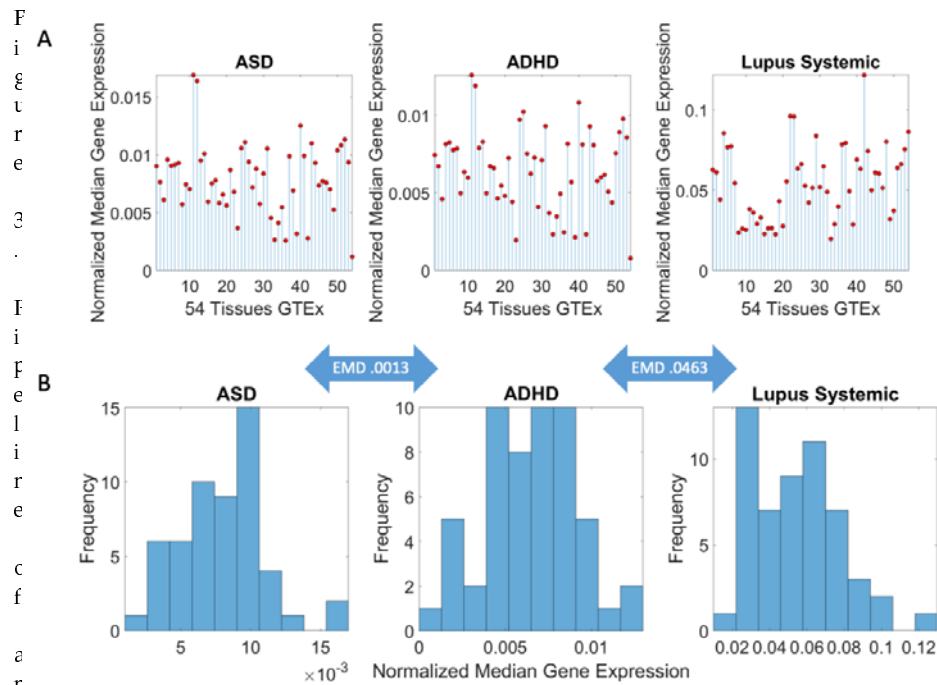

ysis to obtain pairwise similarity measurements between disorders. (A) The matrix of  $N$  genes  $\times$  54 tissues whereby is  $ij$  entry is the gene expression from the row  $i$  in the tissue  $j$ , is transformed into a  $1 \times 54$  vector of median gene expression values (across the matrix rows) represented here in stem form, from the normalized values accounting for the number of genes in each disorder. Each red dot represents the median gene expression at the  $j$ th tissue. Three representative disorders are shown. (B) Histogram of the genes' normalized expression correspond to the stem plots of panel (A). I take the earth mover's distance (EMD) pairwise between two disorders (represented in the arrow) and build a matrix of EMD values representing the distance (similarity) between two disorders in the precise sense of genetic information contributing to genes' expression on tissues.

346 I obtained for each set of reported DisGeNet genes linked to each disorder, their ex-  
347 pression across the 54 tissues from the GTEx project. This yielded a matrix of N genes x  
348 54 tissues, where each entry in the matrix is the gene's expression in that tissue. Taking  
349 the median across all rows for each column (*i.e.*, the number of genes in the disorder)  
350 gives a 1 x 54 vector array of median genes' expression per tissue, which I normalize by  
351 the total number of genes in that disorder (scaling it to range between 0 and 1 unitless  
352 quantity). This is depicted in stem form in Figure 3A for each of 3 different representa-  
353 tive disorders (ASD, ADHD and Lupus Systemic.) I then take the histogram of the val-  
354 ues (represented by red dots in Figure 3A) and obtain the Earth Mover's Distance (EMD)  
355 [53-55] between histograms, to code the distance in some probability space where I can  
356 represent these histograms according to an empirically fit continuous family of proba-  
357 bility distributions. I obtain the EMD quantity pairwise between disorders, normalize it  
358 by the maximum value across the entire set, and represent it in matrix form for neuro-  
359 psychiatric, neurological disorders and non-neurological diseases. I ask if clusters  
360 self-emerge from this representation of the median genes' expression across the 54 tis-  
361 sues.

### 362 3. Results

#### 363 3.1. Neuropsychiatric Disorders and Autism Share Common Genes Expressed in Brain Tissues 364 for Motor, Emotional and self-Regulatory Control.

365 Quantification of genes common to Autism and neuropsychiatric disorders is de-  
366 picted in Table 1. Figure 4A shows the pairwise shared genes color-coded (in log N color  
367 scale, where N is the number of genes in common with the Autism-linked SFARI set.)  
368 The inset in Figure 4A shows the distribution of genes common to the Autism linked  
369 SFARI database and each of the neuropsychiatric disorders under consideration, schiz-  
370 ophrenia, ADHD, depression, and bipolar depression and including the neurological  
371 disorders. Notice that ADHD and Schizophrenia share the highest number of genes fol-  
372 lowed by depression and bipolar depression. Interestingly, I included PTSD owing to  
373 the tendency of trauma reported in Autism [51, 56, 57] and found 55 genes of those  
374 linked to PTSD in the SFARI-Autism set. I also included lupus systemic, owing to the  
375 known relations between autism and autoimmune disorders [58, 59].

376 **Table 1.** Overlap between Autism-linked genes in SFARI and known neuropsychiatric disorders,  
377 ranked by the % of genes obtained relative to the number of genes in the SFARI set under consid-  
378 eration here.

| Neuropsychiatric Condition | Number of Genes in DISGENET | Number of Genes Shared with SFARI ASD-linked Genes | % (Relative to DisGeNet, relative to 906 SFARI genes) |
|----------------------------|-----------------------------|----------------------------------------------------|-------------------------------------------------------|
| Schizophrenia              | 2,697                       | 336                                                | (24.58, 37.08)                                        |
| ADHD                       | 795                         | 188                                                | (23.64, 20.75)                                        |
| Depression                 | 1,407                       | 158                                                | (11.22, 17.43)                                        |
| PTSD                       | 395                         | 55                                                 | (13.92, 6.07)                                         |
| Bipolar Depression         | 116                         | 33                                                 | (28.34, 3.6)                                          |

#### 379 3.2. Neurological Disorders and Autism Share Common Genes Expressed in Brain Tissues for 380 Motor, Emotional and Regulatory Control

381 Likewise, quantification of genes linked to well-known neurological disorders and  
382 present in the SFARI-Autism dataset yielded up to 164 overlapping genes. These are de-  
383 picted in Tables 1-2 for neuropsychiatric and neurological disorders respectively. I  
384 ranked them in each category by % relative to the 906 genes in the SFARI set under con-  
385 sideration, and by the number of genes associated to each disorder in DisGeNet. The  
386 shared genes are also shown in Figure 4A, color coded according to the number of genes



387  
388  
389  
390  
391  
392  
393  
394  
395  
396  
397  
398  
399  
400  
401  
402  
403  
404  
405  
406  
407  
408  
409

in the intersection of SFARI-Autism and each disorder, and between disorders, taking the pairwise intersection. Table 1 shows that among the neuropsychiatric conditions, schizophrenia is the one with the highest percentage of genes shared with the SFARI-Autism set. Table 2 shows that among the neurological conditions, Parkinson's disease has the highest percent shared with the SFARI-Autism set. This result came as a surprise, but it helps explain why as autistics age, the onset of Parkinson-like symptoms is reported by 40 years of age in 20% of the autistic adult population. This contrasts with .09% after 65 years of age in the general population [37]. Furthermore, this shared genetic pool between SFARI-Autism and the DisGenet genes associated to Parkinson's disease helps explain the marked stochastic shift away from typical ranges of noise levels found in autistics at 40 years of age, when examining their involuntary head micro-motions at rest [30].

Surprisingly also was the finding concerning schizophrenia in Figure 4A, whereby 837 genes are shared between Parkinson's disease and the schizophrenia set, while 439 are shared between ADHD and schizophrenia. Furthermore, 625 genes are shared between lupus systemic and schizophrenia. This figure depicts the shared gene pool across these selected disorders that also show their genes overlapping with Autism-linked genes (on the top row.) The numbers next to the disorder are the number of genes reported in DisGeNet. The numbers in the color map entries are those shared pairwise between the disorders in row *i* and column *j* of the matrix. Figure 4B shows the tissues with the maximal gene expression using a color bar (in log median TPM) sorted in descending order. These are the genes common to all the disorders under consideration that overlap with SFARI-Autism genes.

410  
411  
412  
413  
414  
415  
416  
417  
418  
419  
420  
421  
422  
423  
424  
425  
426  
427  
428

### 3.3. Examination of the Maximal Gene Expression on the Tissues for Genes Common to Autism

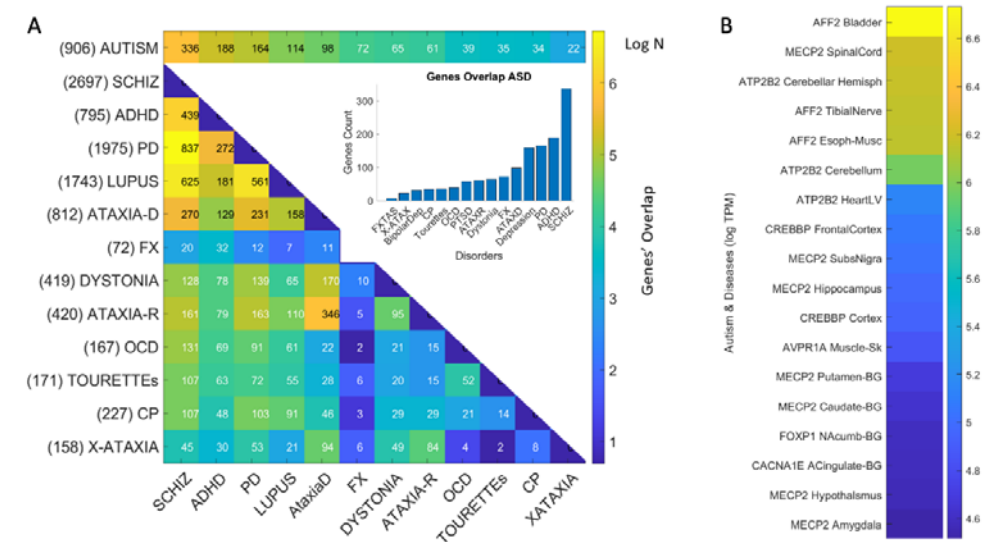

429  
430  
431  
432  
433  
434  
435  
436  
437

Revealed a Compact Gene Pool.

I found that 12 genes common to Autism and these disorders are maximally expressed on the 54 tissues. They are depicted in Table 3 along with the tissues where they maximally express, while Figure 4B shows the genes maximally expressed on the 18 tissues of interest (brain, spinal cord, tibial nerve, and those key to cardiac, smooth, and skeletal muscles.) I discuss later some of the literature on these known genes. I also provide supplementary text files containing for each disorder, the pairwise genes in common between Autism and each disorder or disease under consideration.

438 **Figure 4.** Number of genes common to Autism and selected neuropsychiatric, neurological, and  
 439 autoimmune disorders. (A) Inset shows bar plot tallying the number of genes in each disorder that  
 440 are also present in the SFARI dataset linking genes to Autism according to a confidence score (see  
 441 methods.) Colormap depicting the number of genes in Autism and each disorder on the top row.  
 442 Pairwise shared genes between disorder in row  $i$  and column  $j$  is the number on each entry of the  
 443 matrix. Color is in  $\log N$ , where  $N$  is the number of genes common to Autism and the disorder, or  
 444 common to a disorder and another disorder (pairwise intersect.) (B) Color bar reflecting the 18  
 445 tissues with maximal gene expression and the corresponding gene at the intersection of  
 446 SFARI-Autism and all shared genes in (A.)

447 **Table 2.** Overlap between Autism-linked genes in SFARI and known neurological disorders of  
 448 genetic origins ranked based on % relative to the set of 906 SFARI genes under consideration here.

| Neurological Disorder         | Number of Genes Reported in DISGENET | Number of Genes Shared with SFARI ASD-linked Genes | % (Relative to DisGeNet, relative to 906 SFARI genes) |
|-------------------------------|--------------------------------------|----------------------------------------------------|-------------------------------------------------------|
| Parkinson's                   | 1,975                                | 164                                                | (8.3, 18.10)                                          |
| Ataxia Autosomal Dominant     | 812                                  | 98                                                 | (12.06, 10.81)                                        |
| FX                            | 72                                   | 72                                                 | (100.0, 7.94)                                         |
| Dystonia                      | 419                                  | 65                                                 | (15.51, 7.17)                                         |
| Ataxia Autosomal Recessive    | 420                                  | 61                                                 | (14.52, 6.73)                                         |
| OCD                           | 167                                  | 39                                                 | (23.35, 4.30)                                         |
| Tourette's                    | 171                                  | 35                                                 | (20.46, 3.86)                                         |
| CP                            | 227                                  | 34                                                 | (14.97, 3.75)                                         |
| X-Ataxia                      | 158                                  | 22                                                 | (13.92, 2.42)                                         |
| FXTAS                         | 63                                   | 22                                                 | (34.9, 2.42)                                          |
| Progressive Cerebellar Ataxia | 134                                  | 13                                                 | (9.70, 1.43)                                          |

449 **Table 3.** Compact set of genes common to Autism and the neurological and neuropsychiatric dis-  
 450 orders maximally and selectively expressed across the 54 tissues.

| Genes Common to ASD and Neuro-Disorders | Tissue with Max Expression                                                                                                                                                                                                                                                                                                                                                                                                                                              |
|-----------------------------------------|-------------------------------------------------------------------------------------------------------------------------------------------------------------------------------------------------------------------------------------------------------------------------------------------------------------------------------------------------------------------------------------------------------------------------------------------------------------------------|
| ACTB                                    | Liver                                                                                                                                                                                                                                                                                                                                                                                                                                                                   |
| AFF2                                    | Adipose Subcutaneous, Adipose Visceral Omentum, AdrenalGland, Artery Aorta, Artery Coronary, Artery Tibial, Bladder, Breast Mam Tiss, Cervix Ectocervix, Cervix Endocervix, Colon Sigmoid, Colon Transverse, Esophagus Gastro esophageal Junction, Esophagus Muscularis, Fallopian Tube, Heart AtrialAppendage, Kidney Cortex, Kidney Medulla, Lung, Minor Salivary Gland, Nerve Tibial, Pituitary, Prostate, Small Int ileum, Spleen, Stomach, Thyroid, Uterus, Vagina |
| AKAP9                                   | Whole Blood                                                                                                                                                                                                                                                                                                                                                                                                                                                             |
| ALDH5A1                                 | Esophagus Mucosa                                                                                                                                                                                                                                                                                                                                                                                                                                                        |
| ATP2B2                                  | Heart Left, Ventricle, Ovary, Cerebellar Hemi, Cerebellum                                                                                                                                                                                                                                                                                                                                                                                                               |
| AVPR1A                                  | Muscle Skeletal                                                                                                                                                                                                                                                                                                                                                                                                                                                         |
| CACNA1E                                 | Ant Cingulate Cortex                                                                                                                                                                                                                                                                                                                                                                                                                                                    |

|         |                                                                                                     |
|---------|-----------------------------------------------------------------------------------------------------|
| CHD7    | Pancreas, Skin not Sun Exposed Suprapubic, Skin Sun Exposed Lower Leg                               |
| CREBBP4 | Cortex, Frontal Cortex, Fibroblasts, Cell-Lymphocytes                                               |
| FOXP1   | Nucleus Accumbens of the Basal Ganglia (BG)                                                         |
| MECP2G  | Amygdala, Caudate-BG, Hippocampus, Hypothalamus, Putamen-BG, Spinal Cord-Cervical, Substantia Nigra |
| SMAD4   | Testis                                                                                              |

*omic Stratification of Neurological and Neuropsychiatric Diseases Making Up Autism Today*

The EMD taken pairwise between Autism and each disorder, and pairwise across all neuropsychiatric, neurological disorders and non-neurological diseases revealed an orderly stratification of disorders, whereby a common gene pool and expression on the tissues can clearly separate neuropsychiatric and neurological from non-neurological diseases. This is shown in Figure 5A, where we can also appreciate that in the non-neurological diseases, the autoimmune ones share a common gene pool and tissue expression. Notably, colon cancer is also close in a probability distance sense, to neurological disorders of known genetic origin, namely, Fragile X, FXTAS, the ataxias, dystonia, and Parkinson's disease.

Zooming into the entries with lowest EMD value, corresponding to the neuropsychiatric and neurological disorders, we see in Figure 5B, that other patterns self-emerge further refining the clusters. There, we can appreciate that ASD is close to ADHD and Schizophrenia, as well as close to Depression, PTSD and Cerebral Palsy. Furthermore, OCD and Tourette's cluster close together, also showing a common gene pool and genes' expression across the tissues. In the group of the neurological disorders of known etiology, we can visualize self-grouping of FX and the ataxias (dominant and recessive), while X-ataxia, dystonia, Progressive cerebellar ataxia, and Parkinson self-cluster and separate from FXTAS.

To further test this visualization, I ran a common clustering procedure using MATLAB linkage function applying Euclidean distance and plotting the output as a dendrogram. This shows the orderly binary tree structure of these genes-tissues grouping in Figure 5C. We can see that there are three main subtrees of the binary tree, *i.e.*, two subtrees comprised of neurological disorders, and one with neuropsychiatric disorders of the types diagnosed by the DSM. Further refinement reveals FXTAS as a leaf of its own, close to progressive cerebellar ataxia, dystonia, and X-ataxia, all under the same subtree. The other subtree contains Parkinson's disease, ataxia dominant and recessive and Fragile X.

At the neuropsychiatric end, we see that Tourette's and OCD group in a branch and bipolar depression is a leaf of its own, while schizophrenia and SFARI-Autism fall the closest together in one branch of the same subtree. That subtree also groups PTSD, Depression and ADHD under one branch and shows CP as a leaf of its own. These gene pools and their expression on the 54 GTEx tissues define an orderly stratification aided by genes common to autism spectrum disorders, according to DisGeNet and SFARI genomic reports.

Clustering by tissues maximally expressing the shared genes across disorders (Figure 5D), we can see 5 groups of tissues whereby, the cerebellum and cerebellar hemisphere are by far the tissues with the highest gene expression, followed by the prefrontal cortex and pituitary gland. The following group is comprised of the anterior cingulate cortex, the basal ganglia's caudate and nucleus accumbens, the brain cortex, the hypothalamus, followed by the cluster containing the amygdala, hippocampus, putamen, and substantia nigra. The lowest expression is in the cluster containing no brain tissues, but tissues important for survival and overall functioning of cardiac (heart atrial appendage, heart left ventricle), smooth (esophagus mucosa, bladder) and skeletal muscles (muscle skeletal.)

504  
505  
506  
507  
508  
509  
510

Furthermore, I examined the pairwise intersection sets of genes shared between SFARI-Autism and each of these disorders in the neurological and neuropsychiatric sets. These are found in Figure 5E, as they grouped according to the EMD metric (expressed here in log scale.) The hierarchical clustering revealed two main subtrees in this case, one comprising PD and early and late onset PD in the intersection with SFARI-Autism. The other branch revealed an orderly grouping of neurological disorders surrounding the neuropsychiatric disorders (depression, schizophrenia, ADHD, and PTSD.)

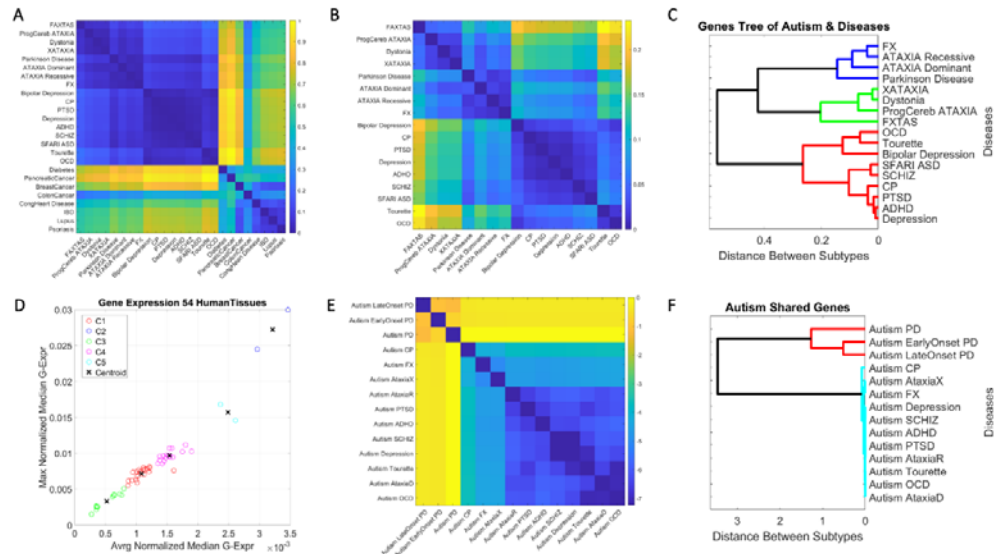

511

512  
513  
514  
515  
516  
517  
518  
519  
520  
521  
522  
523  
524  
525  
526  
527  
528  
529  
530  
531  
532  
533  
534  
535  
536  
537

**Figure 5.** Genomic stratification of Autism and diseases obtained by leveraging the gene pool that overlaps with other known neurological and neuropsychiatric diseases and their expression on the 54 tissues defined by GTEx. (A) EMD-based separation between neuropsychiatric, neurological disorders and non-neurological diseases, also identifying common gene pool in autoimmune diseases. Color scale is the normalized EMD value taken pairwise between the vector of median gene expression across 54 tissues of GTEx. (B) Zooming into the neuropsychiatric and neurological diseases whose gene pool overlaps with Autism, I see different self-emerging subclusters further refining the stratification. (C) Dendrogram showing the binary tree orderly organization that groups and categorizes diseases according to genes' overlap and tissue expression with respect to ASD. (D) Output of K-Means algorithm with 5 tissue-cluster criteria taken on shared genes between SFARI-Autism and each disorder/disease in (B-C). Cluster 1 (red) includes the amygdala, hippocampus, putamen, and substantia nigra. Cluster 2 (blue) in a category of its own, includes the cerebellar hemisphere and the cerebellum. Cluster 3 (green) does not contain brain tissues but contains tissues important for cardiac (heart atrial appendage, heart left ventricle), smooth (esophagus mucosa, bladder) and skeletal muscles (muscle skeletal.) Cluster 4 (magenta) contains the anterior cingulate cortex, the basal ganglia's caudate and nucleus accumbens, the brain cortex, the hypothalamus. Cluster 5 (cyan) contains the frontal cortex and the pituitary gland. (E) Similarity matrix built by taking the normalized Earth Mover's distance metric pairwise between the genes in the intersection of Autism and each of the 14 disorders under consideration. Higher distances (yellow) indicate more effort to transform the distribution of median values of genes' expression (taken across the 54 tissues) from one set of SFARI-Autism shared genes and a given disorder, with another set of SFARI-Autism shared genes and another disorder. (F) Hierarchical clustering of these shared genes identifies two main groups of shared genes with SFARI-Autism, one formed by those SFARI-Autism genes found in the genes linked to PD, early onset PD and late onset PD, and the other formed by the genes shared (pairwise) with each of the other neuropsychiatric and neurological disorders under consideration.

538  
539  
540  
541

Figures 6 and 7 reveal the genes expression for values above ( $\log(e^{60})$  TCM) with the SFARI confidence score on the horizontal axis and the expression value  $\log$  TCM on the vertical axis. Figure 6 shows the brain tissues and genes above this level of expression along with the confidence score in the SFARI data repository. Tissues that are funda-

542 mental for the development and maintenance of motor learning, motor coordination and  
 543 motor adaptation include the substantia nigra (maximal expressed gene *AFF2-AUT1*  
 544 signifying this gene is scored in SFARI as score 1 confidence), basal ganglia with cau-  
 545 date, putamen and nucleus accumbens also with *AFF2-AUT1* as top expressing gene.  
 546 Other tissues involved in motor control are the cerebellar hemisphere (*ATP2B2-AUT2*)  
 547 and the cerebellum (*CREBBP-AUT1*). Tissues known to be involved in executive func-  
 548 tion are the brain frontal cortex (*MECP2-AUT1*) and the brain cortex (*CACNA1E-AUT2*).  
 549 Tissues known for their involvement in emotions (amygdala (*AFF2-AUT1*)) and  
 550 memory (hippocampus (*BRSK2-AUT1*)) and the anterior cingulate cortex (*BRSK2-AUT1*)  
 551 are also depicted in Figure 6, along with the schematics of the brain from Figure 1 with  
 552 the locations of these areas.

553 In Figure 7, I also reveal those genes' expression and SFARI scores for the cardiac

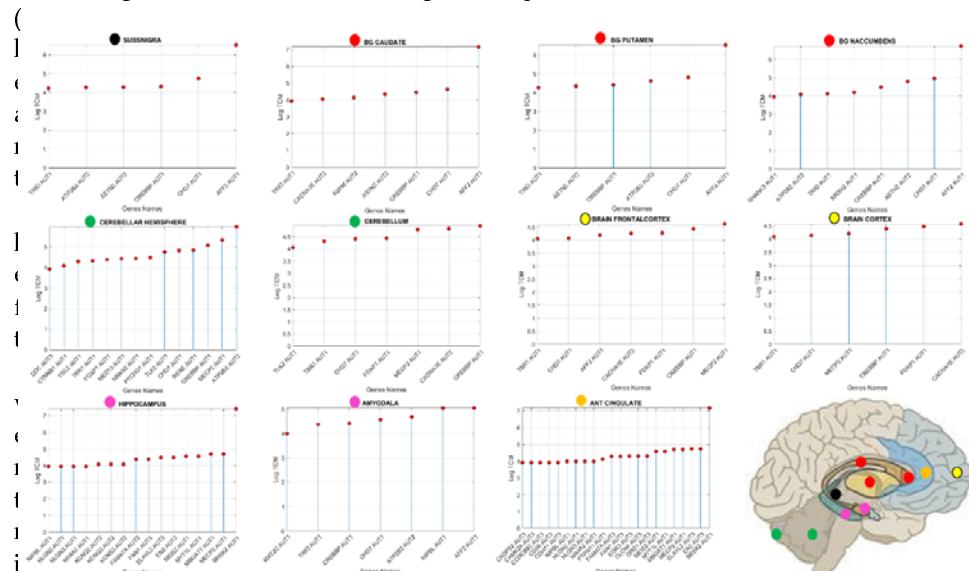

572 cle and the heart atrial appendage), skeletal (muscle skeletal), and smooth muscle  
 573 (esophagus muscularis and bladder) tissues and for the nerve tibial. The latter is critical  
 574 to develop kinesthetic reafference and proper gait, known to be disrupted in several of  
 575 these disorders (autism, PD, FX [44]). Common to all these disorders are well known  
 576 genes in the Autism literature with SFARI score confidence 1 (e.g., *MECP2*, *AFF2*,  
 577 *FOXP1*, *CREBBP*, *CACNA1E*, *CHD7*, *TRIO* and *SHANK3*, among others.) I will later  
 578 discuss the known roles of some of these genes in the development of synapses and cir-  
 579 cuits necessary to form and dynamically maintain neural networks.

581 **Figure 6. Common genes to Autism and all other neurological and neuropsychiatric disorders**  
 582 maximally express on brain tissues involved in the initiation, generation, control, coordination,  
 583 and adaptation of movements, as well as in tissues necessary for the creation, retrieval and  
 584 maintenance of memories and executive function. Genes' expression is threshold above  $\log(e^6)$   
 585 to show the top expressing genes from DisGenNet overlapping with those in the SFARI set (Full list  
 586 of shared genes are in the Supplementary material files.) The AUT# reflects the confidence score  
 587 assigned to the gene at the SFARI repository. Horizontal axis shows the genes above threshold  
 588 and vertical axis gives the expression level (log transcripts count per million, TCM.) Each colored  
 589 dot is shown at the brain tissue in Figure 2A schematic form.

590 I further plot in Supplementary Figures 1-3 genes common to Autism and some of  
 591 the disorders, for the top 20 genes with maximal expression (in log TCM units) across  
 592 the brain and spinal cord tissues, as well as tissues involving muscle skeletal, cardiac,  
 593 and smooth muscle types. These figures in the Supplementary Material show the matrix  
 594 with genes across the rows (top 20 expressed genes) and 18/54 tissues across the col-

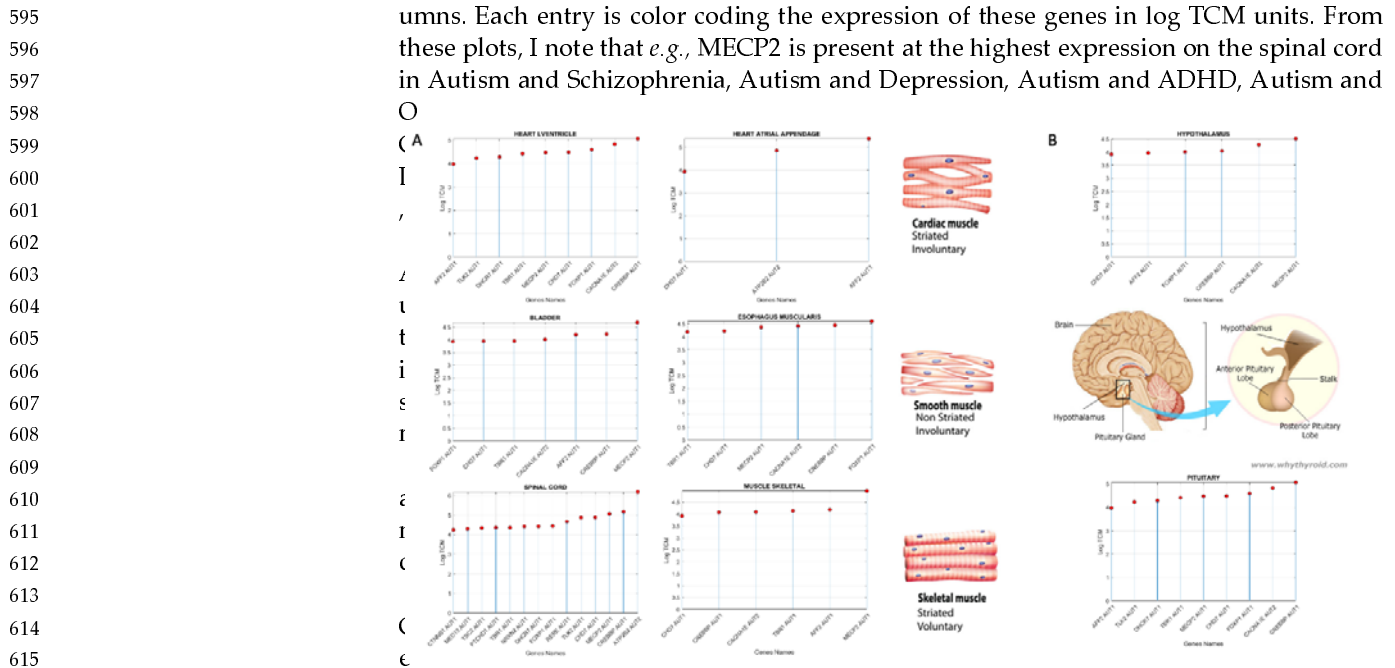

616 rebral Palsy, Autism and Dystonia, Autism and Autosomal Dominant Ataxia, Autism  
617 and Autosomal Recessive Ataxia, Autism and Fragile X, Autism and X-ataxia, Autism  
618 and PTSD but not in Tourette's & Autism, where MECP2 is not among the top 20 genes  
619 expressed on these tissues. Instead, CHD2 is expressed on the spinal cord, and highly  
620 expressed on the cerebellum and cerebellar hemisphere. Indeed, Tourette's is closer to  
621 OCD (Figure 5C) than to the cluster formed by ASD, ADHD and Schizophrenia (though  
622 located on the same subtree as these neuropsychiatric disorders, but in a separate branch  
623 containing bipolar depression too.)  
624

625 **Figure 7. Genes present in Autism and all other neurological and neuropsychiatric disorders**  
626 **maximally expressed (above  $\log(e^{60})$  on tissues involved in all vital functions associated with car-**  
627 **dial, smooth, and skeletal muscles and the spinal cord (A), and with self-systemic regulation (B).**  
628 **Top genes and corresponding SFARI confidence score are also plotted on the horizontal axis. Vertical**  
629 **axis reflects the expression in log TCM units. Schematics reflect the locations of the hypo-**  
630 **thalamus and pituitary gland in the brain (from [www.whythyroid.com](http://www.whythyroid.com))**

#### 631 4. Discussion

632 This work provides support to the idea of reframing Autism under the model of  
633 Precision Medicine [25, 50], while also addressing the notion of an "Autism epidemic"  
634 recently portrayed as an exponential rise in prevalence [60] and its costly consequences  
635 [60]. Re-examining Autism as the conglomerate of disorders and diseases, many of  
636 known origins, comprising this heterogeneous spectrum, I conclude that such "epidemic"  
637 or "tsunami" is bound to be an artifact of the current behavioral diagnosis-to-treatment  
638 pipeline. This pipeline allows such comorbidities and often shifts criteria, discouraging  
639 stratification. I invite the thought that stratifying the spectrum according to underlying  
640 genetic, causal information would provide far more viable strategies to cope with the  
641 overall increase in neurodevelopmental disorders in general, than continuing the use of  
642 Autism as a blanket label grouping all these disorders. Furthermore, I argue that several  
643 of the disorders in question already have therapies designed to address issues in their  
644 corresponding phenotype. As such, the general Autism label, when funneled through  
645 genetic subtypes, could leverage the accommodations, and offer support pertinent to  
646 each of the neurological and neuropsychiatric groups conforming its broad spectrum

647 today. Here we report that they have a considerable genetic overlap with the genes  
648 linked to SFARI-Autism.

649 Autism serves as an umbrella term encompassing many disorders and diseases,  
650 some of which have precise etiology (e.g., Down Syndrome [61], Fragile X Syndrome  
651 [62], etc.) I therefore combined multiple open access data sets with the label of Autism  
652 and with the label of a disorder or disease that often receives the Autism diagnosis. I in-  
653 cluded neuropsychiatric disorders, and neurological and non-neurological diseases as-  
654 sociated with some sets of genes. Then, I applied common computational techniques to  
655 attempt to automatically and orderly stratify a cohort of 25 diseases and 20,923 genes  
656 expressed on 54 brain and bodily tissues, vital for the survival and functioning of the in-  
657 dividual

658 I show that given a random draw of genes linked to disorders with high penetrance  
659 in Autism, and even some which are not officially associated with autism, one could find  
660 self-emerging clusters at their intersection. Using (probabilistic) distance metric as-  
661 sessing the similarity between genes associated to autism and those associated to the  
662 other disorders, and examining their expression in brain-body tissues, several important  
663 patterns self-revealed. Among them, DisGeNet Parkinson's disease emerged as the neu-  
664 rological condition with maximal number of shared genes associated to the  
665 SFARI-Autism set under consideration. Schizophrenia appeared as the neuropsychiatric  
666 disorder with maximal number of genes shared with Parkinson's disease. Both  
667 SFARI-Autism and Schizophrenia shared the maximum number of genes with the  
668 SFARI set, strongly suggesting that movement disorders are at the core of both autism  
669 and schizophrenia.

670 I found self-emerging clusters that clearly (and automatically) differentiated neu-  
671 rop psychiatric and neurological disorders from non-neurological diseases and within the  
672 brain-related disorders, I established an orderly distance to Autism in the sense of over-  
673 lapping genes and their expression on tissues critical for motor control (initia-  
674 tion-termination, learning, coordination, sequencing, and adaptation), cognition,  
675 memory, and self-regulation. I also found that the autoimmune disorder lupus systemic  
676 shares 114 genes with those linked to Autism in SFARI (12.6% relative to the 906 genes  
677 in SFARI), a result congruent with recent links between Autism and autoimmune disor-  
678 ders [58, 59, 63].

679 The overall conclusions from these results are several folds: (1) Autism is a move-  
680 ment disorder and should be accordingly redefined and treated as such, rather than  
681 treated as a misbehavior; (2) The broad spectrum of Autism, as we know it today, i.e.,  
682 inclusive of disorders and diseases of known etiology, share a common set of genes with  
683 genetic disorders and consequentially can be stratified into Autism subtypes. (3) Given  
684 this automatic clustering, it is safe to conclude that Autism prevalence rates are an arti-  
685 fact of current surveillance methods relying exclusively on the clinical (behavioral) di-  
686 agnosis that welcomes other disorders. Incidentally, it has been shown that such meth-  
687 ods of diagnoses use fundamentally flawed statistics in the criteria, thus inflating false  
688 positives [9]. Furthermore, digitizing them with wearable biosensors, captures the fun-  
689 damental differences in females, saves time, thus being less taxing on the children and  
690 offering a new level of finer granularity of physiological function, well beyond the limits  
691 of the naked eye. As such, digitized dyadic interactions during the ADOS opens a new  
692 avenue for precision (physiological) phenotyping that, when combined with genomics  
693 results here, stands to reformulate autism research under the tenets of Precision Medi-  
694 cine [25, 64].

695 The genetically-based subtypes reported here might be more manageable and less  
696 costly to treat and service, than forecasted by current epidemiological accounts relying  
697 only on the psychological construct of "appropriate" social behaviors [60]. Since there are  
698 therapies for other disorders that share genes associated with Autism, it may be possible  
699 to repurpose such therapies and adapt them to corresponding Autism subtypes.

700  
701  
702  
703  
704  
705  
706  
707  
708  
709  
710  
711  
712  
713  
714  
715  
716  
717  
718  
719  
720  
721  
722  
723  
724  
725  
726  
727  
728  
729  
  
730  
731  
732  
733  
734  
735  
736  
737  
738  
739  
740  
741  
742  
743  
744  
745  
746  
747  
748  
749  
750  
751

#### 4.1. The Genetically Informed Autism Subtypes

Given a mixture of genes and their median expression on the 54 tissues defined by GTEx, across multiple neuropsychiatric and neurological disorders, I found that Autism-linked genes in SFARI overlap with genes defining those disorders in DisGeNet, which would also likely receive the Autism label. Such overlapping showed an orderly stratification using a binary tree structure that rendered schizophrenia as the closest to SFARI-Autism (sharing 363/906 genes reported in SFARI) and FXTAS as the farthest (nonetheless sharing 22/906 genes reported in SFARI.) I note that DisGeNet ASD (autism spectrum disorders; CUI: C1510586) is a superset of SFARI, 1,071 *vs.* 906 genes and SFARI genes are ranked according to the literature. I also note that since our last download, the number of genes in SFARI may have increased.

In good concordance with clinical criteria, two main subtypes automatically self-emerged according to the distance metric that I used (Figure 5C) comprising neuropsychiatric and neurological disorders, all sharing a compact set of genes described below. The neuropsychiatric branch includes the Autism linked genes in DisGeNet (overlapping with a subset of those in SFARI) and disorders in the Diagnostic Statistical Manual, 5<sup>th</sup> edition, DSM-5 and the International Classification of Diseases, 10<sup>th</sup> edition, ICD-10. In order of distance to SFARI-Autism, on one end we have schizophrenia (the closest sharing the same sub-branch), CP, PTSD, ADHD (allowed to be co-diagnosed with Autism in the DSM5) and depression. Then, the other branch has bipolar depression, Tourette's, and OCD. Among the neurological disorders conforming the second cluster, I have in order of distance from the SFARI-Autism set, FXTAS, progressive cerebellar ataxia, dystonia, and X-ataxia. The last cluster has Parkinson's disease, ataxia dominant, ataxia recessive and Fragile X, with Parkinson's disease sharing the largest percent of SFARI-Autism genes. This natural breakdown of the (Autism) spectrum according to the shared genetic pool and genes' expression on tissues fundamental to form the building blocks of any human behavior, is far more manageable (using physiological and medical knowledge today) than considering the full spectrum in a monolithic form, as suggested by psychological surveillance methods [1, 60] and the behaviorists' recommendations [13].

#### 4.2. The Genes Common to Autism and Each Subtype

Each neuropsychiatric or neurological subtype identified by the genes-tissue analysis shared genes with the SFARI-Autism set. The full list in Supplementary Materials for each disorder/disease, offers clues with regards to the tissues whereby these intersecting genes maximally express. Furthermore, Figure 5D revealed several clusters of tissues common to all these pairwise-shared genes between the disorders and SFARI-Autism. Among these clusters, the cerebellar hemisphere and the cerebellum emerged as a separate group, common to all these disorders, with the maximum average median gene expression. This cluster of tissues was followed by a cluster that included the frontal cortex and the pituitary gland, also far apart from the other three clusters in Figure 5D.

Autism and schizophrenia, Autism and ADHD, Autism and Depression, Autism and OCD, Autism and FX, Autism and ataxia-X, Autism and PTSD, Autism and CP, Autism and dystonia, Autism and Ataxia autosomal dominant and Autism and Ataxia autosomal recessive, all share METHYL-CpG-binding protein 2, MECP2, with cytogenetic location at Xq28 (according to the Online Mendelian Inheritance in Man, OMIM site). It is reported as implicated in severe neonatal encephalopathy, mental disability and Rett syndrome, as well as to have high Autism susceptibility. MECP2, binds methylated CpGs. It is a chromatin-associated protein that can both activate and repress transcription; it is required for maturation of neurons and is developmentally regulated [65].

Furthermore, Autism and schizophrenia and Autism and ADHD (the two top neuropsychiatric disorders sharing the highest percentages of genes with the genes linked to SFARI-Autism) shared the CREP-Binding Protein (CREBBP), among the top 10 genes



752 expressed maximally across the 54 tissues and common to the Autism and Schizophre-  
753 nia gene pool. It is located in 16p12.3, a chromosomal region linked to Autism.

754 Autism and Tourette's syndrome did not share MECP2, but shared CHD2 as the  
755 top gene maximally expressed across all 18 tissues of the brain, spinal cord and tissues  
756 associated with cardiac, smooth, and skeletal muscles. Maximal expression at the cere-  
757 bellar hemisphere and the cerebellum suggests involvement in motor control, coordina-  
758 tion, and adaptation, while high expression in other tissues for memory, cognition, and  
759 self-systemic regulation suggest that this gene is rather important. Indeed, prior work in  
760 Autism [66] and other neurodevelopmental disorders [67] had conferred importance to  
761 this gene for neural development.

762 Among highly expressed genes in Autism and other disorders, I also found AFF2  
763 [68] and BRSK2 [69], both with score 1 in SFARI and reportedly critical for neurodevel-  
764 opment. Indeed, the X-linked gene AFF2 has been found in patients with fragile X E  
765 (FRAXE) intellectual disability, while the gene encoding the serine/threonine-protein  
766 kinase BRSK2 was recently detected in individuals with developmental and intellectual  
767 disability.

768 To further understand the possible links that have been suggested between Autism  
769 and PD (particularly during adulthood), I also examined the genes from DisGeNet  
770 linked to early (50 genes) and late (238 genes) onset of PD, along with those linked to PD  
771 in general (1,975 genes.) This revealed that DisGeNet PD shares 164 genes with  
772 SFARI-Autism, whereas early onset PD shares 8 and late onset PD shares 32 genes with  
773 those in SFARI-Autism. Among the genes maximally expressed in the tissues of the  
774 brain and the cardiac, smooth, and skeletal muscles in PD, AFF2 and TSC2 were found.  
775 In early onset PD, RAB39B and SLC6A3 were found. Mutations in RAB39B cause  
776 X-linked intellectual disability and early-onset Parkinson disease with alpha-synuclein  
777 pathology, also linked to X-linked mental disability associated with Autism, epilepsy,  
778 and macrocephaly [70-73]. SLC6A3 provides instructions for making the dopamine  
779 transporter protein (DAT) embedded in dopaminergic neurons. Variations (polymor-  
780 phisms) of the SLC6A3 gene have been linked to PD, ADHD [74] and ASD [75]. Dop-  
781 amine is a known neurotransmitter important for multiple cognitive and motor functions,  
782 as well as for the functioning of the reward systems of the brain. In late onset PD, TET2,  
783 ADA and PTGS2 (COX2) were found. Located in 4q24, TET methylcytosine dioxygenase  
784 2 is listed in OMIM as a TET protein playing a key role in the regulation of  
785 DNA-methylation status serving both as a stable epigenetic mark and participating in  
786 active demethylation [76]. TET2 has been described as early and essential stage in so-  
787 matic cell reprogramming preceding the induction of transcription at endogenous  
788 pluripotency loci. It is said to contribute to an epigenetic program that directs subse-  
789 quent transcriptional induction at pluripotency loci during somatic cell reprogramming  
790 [77]. Adenosine deaminase (or adenosine aminohydrolase) ADA is located at 20q13.12  
791 and is associated with severe immunodeficiency [78].

792 These genes and their expression in relevant tissues are shown in the Supplemen-  
793 tary Material Figure 4. It will be interesting to track the evolution of these shared genes  
794 on induced pluripotent stem cell models, as cells develop into neuronal classes. Research  
795 along those lines is warranted [62]. Prostaglandin-endoperoxide synthase 2 PTGS2 or  
796 cyclooxygenase 2 COX2, is in 1q31.1. High-level induction of COX2 in  
797 mesenchymal-derived inflammatory cells suggests a role for COX2 in inflammatory  
798 conditions [79] and CNS-inflammatory pain hypersensitivity [80].

#### 799 4.3. The Genes Common to Autism and All Subtypes

800 MECP2 and CREBBP were found to be shared pairwise with Autism and the  
801 above-mentioned disorders, but also present at the intersection set, taken across disor-  
802 ders. MECP2 expressed maximally in tissues related to emotion (amygdala) and  
803 memory (hippocampus) and tissues important for motor control (basal ganglia's caudate  
804 and putamen regions, the substantia nigra, the cerebellum and cerebellar hemisphere,

805 and the spinal cord) and for self-regulation (hypothalamus.) CREBBP was found to be  
806 maximally expressed at the cortex and frontal cortex, both of which are important for  
807 high-level cognitive and executive functions. Another important forkhead transcription  
808 factor FOXP1 was found to be maximally expressed in the basal ganglia's nucleus  
809 accumbens, a structure important for developing striatal function and differentiation in  
810 medium spiny neurons from precursors to maturity [81-83]. CACNA1E was found  
811 maximally expressed across disorders in the anterior cingulate cortex, a region associat-  
812 ed with impulse control, emotion and decision making, and previously known in connec-  
813 tion to epilepsy, Autism, schizophrenia, and major depressive disorder [84-86].

814 Cluster analyses revealed that across all disorders under consideration, the cere-  
815 bellum and cerebellar hemisphere had the maximal gene expression. Yet, different genes  
816 shared with the SFARI-Autism set contributed across disorders. MECP2 was maximally  
817 expressed in both the cerebellum and the cerebellar hemisphere in CP, Dystonia, OCD,  
818 Depression, PTSD and Lupus. In ADHD, MECP2 was maximally expressed in the cere-  
819 bellum but the cerebellar hemisphere maximally expressed CREBBP. As mentioned, in  
820 PD, TSC2 was maximally expressed in both cerebellar tissues, while early onset had  
821 RAB39B and late onset had TET2 maximally expressed in both cerebellar tissues. Tou-  
822 rette's had CHD2. Bipolar depression had SHANK2. Infantile Schizophrenia had  
823 ATP1A, and Schizophrenia had ATP2B2. These are shown in Supplementary Figures 4-6  
824 along with other brain tissues and tissues important for cardiac, smooth, and skeletal  
825 muscles. The mixture of neuropsychiatric, neurological, and autoimmune disorders all  
826 had the cerebellar tissues with maximal gene expression of the genes shared with the  
827 SFARI-Autism set. These genes are thus bound to play an important role in motor con-  
828 trol, coordination, initiation-termination, sequencing and adaptation, all critical compo-  
829 nents of basic building blocks to develop proper motor dynamics in social interactions. It  
830 is not surprising then that Autism has so many motor issues, as it sits squarely at the in-  
831 tersection of these neurological, neuropsychiatric, and autoimmune disorders. *Why are*  
832 *motor issues not seriously considered in Autism research and clinical practices?* Continuing to  
833 sideline the motor and motor sensing axes misses a superb opportunity to finally turn  
834 the science of Autism into a rigorous quantitative practice, beyond opinions or political  
835 agendas currently dominating the field and obfuscating important neurodevelopmental  
836 issues.

#### 837 4.4. Implications of This Genomic Categorization for Treatment Selection in Autism

838 Approaching Autism as genotypically defined orderly subtypes may also be more  
839 humanely relevant to the affected individuals. Today, they receive recommendations for  
840 a "one-size-fits-all" behavioral-modification or conversion-therapy to reshape "socially  
841 inappropriate behaviors" without informing such treatments by brain-body physiologi-  
842 cal and medical issues. This approach disregards possible adverse effects linked to their  
843 genomic characteristics [87]. Indeed, despite advances in genetics, it has been reported  
844 that the current paradigm neglects the physiological phenotypes in favor of psychologi-  
845 cal constructs [33]. The literature reports that this model for Autism treatment selection  
846 promotes stigma, causes harm in the form of trauma, increases the person's stress and  
847 ultimately results in PTSD [88]. Along those lines, there is a pool of genes linked to PTSD  
848 and depression overlapping with a subset of the SFARI-Autism data set, and very close  
849 to the Autism branch of the binary tree in Figure 5C. These genes may interact in ways  
850 that could increase the predisposition of the Autistic system to develop PTSD and de-  
851 pression, explaining the rise as well in suicidal ideation [51, 89-91].

852 The outcome of this work highlights the relevance of considering, when choosing  
853 treatments, the medical and physiological issues linked to the phenotypic characteristics  
854 that these genes forecast. This proposed approach contrasts with choosing treatments  
855 that exclusively focus on the social appropriateness criteria. The latter model has been  
856 said to lead to high societal cost [60, 92], to offer no future to the affected individuals and

857 their families and has recently been shown to be polluted with conflict of interests and  
858 nonscientific practices [93, 94].

859 In the present study, I reasoned that stratifying Autism based on the genetic  
860 makeup of the diseases that today go on to receive the Autism clinical diagnosis, could  
861 help us in various ways. One was to find the diseases genetically closer to Autism itself  
862 (as defined by the SFARI genes.) Another was to leverage existing clinical information in  
863 other fields, amenable to create support and accommodations for the individuals affect-  
864 ed by those disorders undergoing physiologically relevant treatments in other fields.  
865 Such accommodations could then be tailored to the autistic person, according to the  
866 phenotype that these genetic pools express for each of these other diseases of known eti-  
867 ology. Furthermore, since Autism today includes all these other disorders in its broad  
868 spectrum, utilizing the information that has already been verified (*e.g.*, in the SFARI re-  
869 pository) would bring us a step closer to the Personalized Medicine approach, coined  
870 here *Precision Autism* (Figure 1B.)

871 It has been recently proposed that the behavioral definition of Autism, which rec-  
872 ommends against stratifying the spectrum [13], feeds the Autism Industrial Complex  
873 (AIC) [92] and opens a behavioral diagnosis-to-treatment pipeline contributing to their  
874 claimed societal burden [60]. It is almost perverse to create a problem and sustain the  
875 problem by sidelining existing solutions, or alternative scientific routes, when the same  
876 model practiced over 40 years has not worked. It is as though to remain relevant and  
877 well-funded, that group steering autism research through the behavioral diagnos-  
878 tic-to-treatment pipeline, persists in neglecting the physiological issues.

879 The stratification of Autism revealed by the gene pool under consideration under-  
880 scores the need to seriously consider the somatic-sensory-motor issues in the spectrum.  
881 This spectrum of disorders today includes diseases of known origins (*e.g.*, Timothy Syn-  
882 drome, SYNGAP1, SHANK3 deletion syndrome, Fragile X, Cerebral Palsy and Dystonia,  
883 among others) with life-threatening conditions that could seriously harm the affected  
884 child under the type of stress that a behavioral modification technique has been said to  
885 bring to their nervous systems [56, 87, 95].

886 This work revealed a compact set of top genes shared by SFARI-Autism and all  
887 diseases demonstrating that they too share tissues critical for (*i*) somatic-sensory-motor  
888 functioning, (*ii*) memory and cognition and (*iii*) systemic self-regulation. This compact  
889 set of genes for each of these functions in (*i-iii*) underly all critical physiological ingredi-  
890 ents for social communication and smooth, well-coordinated actions. These basic func-  
891 tions are essential to all human autonomic, involuntary, and voluntary behaviors. As  
892 such, they should not be sidelined when recommending and selecting treatments for  
893 Autism. I provided a distance from each disorder to SFARI-Autism based on the genes'  
894 expression on these 54 tissues defined by GETx, in the hopes of offering new ways to  
895 converge to truly personalized interventions that agree with the individual's physiolog-  
896 ical phenotype and with the endophenotype of a genetically informed group.

897 I concluded from these analyses that the highly publicized exponential rate in prev-  
898 alence reported by the US CDC surveillance network is a myth. This myth has been built  
899 by broadening and shifting the criteria over time and by allowing diseases of known eti-  
900 ology be part of the Autism spectrum. The increase in neurodevelopmental disabilities is  
901 real, as evidenced by the compact set of genes identified to be common to SFARI-Autism  
902 and all other diseases under consideration. All these genes play a fundamental role on  
903 the development of synapses via proteins that are necessary for channels functioning  
904 and neurotransmitters balance, neuronal differentiation, the formation of circuits and  
905 networks, *etc.*, during neurodevelopment [96]. Yet, these disorders exist independent of  
906 Autism. Calling them Autism, under the current definition of inappropriate social be-  
907 haviors may be doing more harm than benefit. The current model stigmatizes the af-  
908 fected individuals [60], their families and negatively impact the entire ecosystem inclu-  
909 sive of research, services and education, by promoting an erroneous perception of Au-  
910 tism as a behavioral issue [88]. By neglecting the physiology of the disorders that make

911 up Autism today, the current approach skews the therapy recommendations for Autism  
912 in ways that may in fact harm their nascent nervous systems, induce trauma, and lower  
913 quality of life.

914 Given these results, I invite rethinking the epidemiology of autism spectrum disor-  
915 ders, to go beyond the behavioral diagnosis when surveying the spectrum to estimate  
916 prevalence. I also offer a new avenue to adapt the platform of Precision Medicine to Au-  
917 tism and disclose the implications of these results for the design of truly personalized  
918 therapies aimed at helping the affected individuals become an integral part of society.  
919

#### 920 4.5. *The Importance of Reframing Autism under the Precision Medicine Paradigm*

921 This notion of personalized medicine for Autism that I have proposed [25, 50], con-  
922 trasts with the current behavioral diagnosis-to-treatment pipeline that discourages strat-  
923 ification of Autism and advocates for a general (one-size-fits-all) model of behavioral  
924 modification. Indeed, the last study from the U.S. National Academy of Science (NAS)  
925 considering how to educate autistic children, recommended that Autism shall not be  
926 stratified [13]. Since then, practice and services do not distinguish *e.g.*, between a child  
927 with Cerebral Palsy and a child with ADHD. Both receive the Autism diagnosis, and  
928 both will receive a form of behavioral modification to reshape social behaviors in com-  
929 pliance with a set of social norms that bear no scientific empirical evidence for their  
930 recommendations. As mentioned, such imposed norms were never informed, in any  
931 way, by the nervous systems physiology [9]. The accreditation programs enabling such  
932 behavioral diagnoses and interventions in fact lack training on basic neuroscience<sup>1</sup>. In  
933 the US, these treatments will be administered at the school and the home, under a type  
934 of insurance coverage that other therapies do not have.

935 Our results show that contrary to the recommendations of the 2001 NAS study,  
936 such stratification is not only possible today, but more importantly, it is much needed to  
937 help guide and inform the design of new targeted therapies for Autism. Such new ther-  
938 apies could be truly personalized to address phenotypic features of the CNS, including  
939 tissues linked to self-regulating systemic structures, memory, cognition, and motor con-  
940 trol. They would consider the physiology of numerous networks in the human  
941 brain-body complex, serving as the building blocks of all behaviors.

942 The methods used in this work are rather simple and parsimonious. They also rely  
943 on open access data sets. These sets are reliable and provide the grounds for reproduc-  
944 ibility of this and related works [25, 50]. I encourage the community to stratify Autism  
945 into the appropriate phenotypes with capabilities, predispositions and needs causally  
946 linked to the genetic origins of each subtype. Continuing the blanket approach also  
947 misses three important revolutions of the 21<sup>st</sup> Century: the genomic, the neuroscience  
948 and the wearables sensors revolution. The latter brings a level of precision to analyze  
949 continuous streams of behaviors beyond the limits of the naked eye, capable of auto-  
950 matically separating genetic-based disorders from natural, simple behaviors like walk-  
951 ing and yet uncovering individual stochastic signatures of the person's biorhythms with  
952 causal dynamics [44].

953 If we follow the medical and physiological scientific path, we will be able to ad-  
954 vance Autism research, treatments, and services. But if we continue to follow the circular  
955 behaviorist approach, we will not make headways in identifying personalized targeted  
956 treatments. Worse yet, this antiquated approach, dating back to Skinner's ideas of the  
957 1950s, developed for research involving pigeons and rats, will continue to cause trauma  
958 to the individual in the spectrum. *Who came up with the notion of translating such methods*  
959 *to human children, without providing any validated scientific evidence that they would work in*

---

<sup>1</sup> <https://accreditation.abainternational.org/apply/accreditation-standards.aspx>

<https://www.wpspublish.com/ados-2-autism-diagnostic-observation-schedule-second-edition>

960 *humas?* Such methods violate the natural autonomy of nascent nervous systems and go  
961 against the development of social agency [32, 97]. The current generation of adults that  
962 underwent such horror has informed us of this outcome. They have created the  
963 neurodiverse movement to alert researchers of the dangers of applying behaviorism to  
964 human babies in early intervention programs and throughout school age.

965 An alternative route to the current research paradigm in Autism is possible, by lev-  
966 eraging the work from other fields of science and engineering, and by stratifying the  
967 broad spectrum that otherwise purportedly keeps exponentially growing [1, 60]. Con-  
968 trary to archaic recommendations from behaviorists [13], here I show that Autism can  
969 and should be stratified to take the first steps toward a paradigm shift toward *Precision*  
970 *Autism*.

971 **Supplementary Materials:** The following are available online at [www.mdpi.com/xxx/s1](http://www.mdpi.com/xxx/s1), Figure S1:  
972 Colormaps of top 20 genes expressed in 54 tissues at the intersection of SFARI-Autism and other  
973 disorders-I, Figure S2: Colormaps of top 20 genes expressed in 54 tissues at the intersection of  
974 SFARI-Autism and other disorders-II, Figure S3: Colormaps of top 20 genes expressed in 54 tissues  
975 at the intersection of SFARI-Autism and another disorders-III, Figure S4-S6 colormaps of genes  
976 shared between SFARI-Autism and other disorders, maximally expressed in brain tissues and tis-  
977 sues linked to cardiac, smooth and skeletal muscles across disorders. Text files list the genes at the  
978 intersection of SFARI-Autism and other disorders.

979 **Author Contributions:** Conceptualization, methodology, software, validation, formal analysis,  
980 investigation, resources, data curation, writing, visualization, supervision, project administration,  
981 funding acquisition, E.B.T.

982 **Funding:** Please add: This research was funded by New Jersey Governor’s Council for the Medical  
983 Research and Treatments of Autism, grant number CAUT15APL038.

984 **Institutional Review Board Statement:** Not applicable. Although the study involves de-identified  
985 data from human participants, these data is open access and required no IRB protocol/approval.

986 **Data Availability Statement:** Data supporting the results can be found at  
987 <https://www.sfari.org/resource/sfari-gene/>, <https://gtexportal.org/home/> and  
988 <https://www.disgenet.org/>.

989 **Acknowledgments:** I thank the families that participated in the genetic studies providing the data  
990 for SFARI, GTEEx and DisGeNet and the supporters of OMIM, as well as the many researchers that  
991 upkeep these data repositories.

992 **Conflicts of Interest:** The authors declare no conflict of interest.

## 993 References

- 994 1. Maenner MJ, S.K., Baio J, et al., *Prevalence of Autism Spectrum Disorder Among Children Aged 8 Years — Autism and*  
995 *Developmental Disabilities Monitoring Network, 11 Sites, United States.*, CDC, Editor. 2020, Morbidity and Mortality Weekly  
996 Report MMWR Surveill Summ 2020. p. 1-12.
- 997 2. Mandy, W., et al., *Sex differences in autism spectrum disorder: evidence from a large sample of children and adolescents.* J Autism  
998 Dev Disord, 2012. **42**(7): p. 1304-13.
- 999 3. Russell, G., et al., *Time trends in autism diagnosis over 20 years: a UK population-based cohort study.* J Child Psychol Psychiatry,  
1000 2021.
- 1001 4. Torres, E.B., et al., *Strategies to develop putative biomarkers to characterize the female phenotype with autism spectrum disorders.* J  
1002 Neurophysiol, 2013. **110**(7): p. 1646-62.
- 1003 5. Torres, E.B. and K. Denisova, *Motor noise is rich signal in autism research and pharmacological treatments.* Sci Rep, 2016. **6**: p.  
1004 37422.
- 1005 6. Torres, E.B., et al., *Characterization of the Statistical Signatures of Micro-Movements Underlying Natural Gait Patterns in Children*  
1006 *with Phelan McDermid Syndrome: Towards Precision-Phenotyping of Behavior in ASD.* Front Integr Neurosci, 2016. **10**: p. 22.

- 1007 7. Torres, E.B., et al., *Stochastic Signatures of Involuntary Head Micro-movements Can Be Used to Classify Females of ABIDE into*  
1008 *Different Subtypes of Neurodevelopmental Disorders*. *Front Integr Neurosci*, 2017. **11**: p. 10.
- 1009 8. Bokadia, H., R. Rai, and E.B. Torres, *Digitized ADOS: Social Interactions beyond the Limits of the Naked Eye*. *J Pers Med*, 2020.  
1010 **10**(4).
- 1011 9. Torres, E.B., et al., *Hidden Aspects of the Research ADOS Are Bound to Affect Autism Science*. *Neural Comput*, 2020. **32**(3): p.  
1012 515-561.
- 1013 10. Lord, C., et al., *The autism diagnostic observation schedule-generic: a standard measure of social and communication deficits*  
1014 *associated with the spectrum of autism*. *J Autism Dev Disord*, 2000. **30**(3): p. 205-23.
- 1015 11. *American Psychiatric Association: Diagnostic and statistical manual of mental disorders (5th ed.)*. 2013, American Psychiatric  
1016 Association: Arlington, VA.
- 1017 12. Mottron, L., *A radical change in our autism research strategy is needed: Back to prototypes*. *Autism Res*, 2021.
- 1018 13. Council, N.R., *Educating Children with Autism.*, in *Division of Behavioral and Social Sciences and Education.*, C. Lord and P.  
1019 McGee, Editors. 2001, National Academy of Science: Washington DC.
- 1020 14. Constantino, J.N., *Response to "A Radical Change in Our Autism Research Strategy is Needed: Back to Prototypes" by Mottron et al.*  
1021 *(2021)*. *Autism Res*, 2021.
- 1022 15. Gotham, K., A. Pickles, and C. Lord, *Standardizing ADOS scores for a measure of severity in autism spectrum disorders*. *J Autism*  
1023 *Dev Disord*, 2009. **39**(5): p. 693-705.
- 1024 16. Esler, A.N., et al., *The Autism Diagnostic Observation Schedule, Toddler Module: Standardized Severity Scores*. *J Autism Dev*  
1025 *Disord*, 2015. **45**(9): p. 2704-20.
- 1026 17. Bermperidis, T., et al., *Optimal Time Lags from Causal Prediction Model Help Stratify and Forecast Nervous System Pathology*.  
1027 *Scientific Reports*, 2021. **11**(20904): p. 1-24.
- 1028 18. Sanger, T.D. and S.N. Kukke, *Abnormalities of tactile sensory function in children with dystonic and diplegic cerebral palsy*. *J Child*  
1029 *Neurol*, 2007. **22**(3): p. 289-93.
- 1030 19. Pham, R., et al., *Definition and diagnosis of cerebral palsy in genetic studies: a systematic review*. *Dev Med Child Neurol*, 2020.  
1031 **62**(9): p. 1024-1030.
- 1032 20. Lin, J.P. and N. Nardocci, *Recognizing the Common Origins of Dystonia and the Development of Human Movement: A Manifesto of*  
1033 *Unmet Needs in Isolated Childhood Dystonias*. *Front Neurol*, 2016. **7**: p. 226.
- 1034 21. Xiao, R., et al., *Abnormal Cerebellar Development Is Involved in Dystonia-Like Behaviors and Motor Dysfunction of Autistic BTBR*  
1035 *Mice*. *Front Cell Dev Biol*, 2020. **8**: p. 231.
- 1036 22. Geurts, H.M., et al., *Intra-individual variability in ADHD, autism spectrum disorders and Tourette's syndrome*.  
1037 *Neuropsychologia*, 2008. **46**(13): p. 3030-41.
- 1038 23. Zablotzky, B., M.D. Bramlett, and S.J. Blumberg, *The Co-Occurrence of Autism Spectrum Disorder in Children With ADHD*. *J*  
1039 *Atten Disord*, 2020. **24**(1): p. 94-103.
- 1040 24. Bell, L., A. Wittkowski, and D.J. Hare, *Movement Disorders and Syndromic Autism: A Systematic Review*. *J Autism Dev Disord*,  
1041 2019. **49**(1): p. 54-67.
- 1042 25. Torres, E.B., *Reframing Psychiatry for Precision Medicine*. *J Pers Med*, 2020. **10**(4).
- 1043 26. Hagerman, R., G. Hoem, and P. Hagerman, *Fragile X and autism: Intertwined at the molecular level leading to targeted treatments*.  
1044 *Mol Autism*, 2010. **1**(1): p. 12.
- 1045 27. Wang, L.W., E. Berry-Kravis, and R.J. Hagerman, *Fragile X: leading the way for targeted treatments in autism*.  
1046 *Neurotherapeutics*, 2010. **7**(3): p. 264-74.
- 1047 28. Torres, E.B., et al., *Autism: the micro-movement perspective*. *Front Integr Neurosci*, 2013. **7**: p. 32.
- 1048 29. Torres, E.B., *Atypical signatures of motor variability found in an individual with ASD*. *Neurocase*, 2011. **19**(2): p. 150-65.

- 1049 30. Torres, E.B., C. Caballero, and S. Mistry, *Aging with Autism Departs Greatly from Typical Aging*. Sensors (Basel), 2020. **20**(2).
- 1050 31. Bermperidis, T., et al., *Optimal Time Lags from Causal Prediction Model Help Stratify and Forecast Nervous System Pathology*.  
1051 BioRxiv, 2021.
- 1052 32. Torres, E.B. and C. Whyatt, *Autism : the movement sensing perspective*. 2018, Boca Raton: CRC Press/Taylor & Francis Group.  
1053 xviii, 386 pages.
- 1054 33. Whyatt, C.P. and E.B. Torres, *Autism Research: An Objective Quantitative Review of Progress and Focus Between 1994 and 2015*.  
1055 Front Psychol, 2018. **9**: p. 1526.
- 1056 34. Hawgood, S., et al., *Precision medicine: Beyond the inflection point*. Sci Transl Med, 2015. **7**(300): p. 300ps17.
- 1057 35. Scott, W.K., et al., *Complete genomic screen in Parkinson disease: evidence for multiple genes*. JAMA, 2001. **286**(18): p. 2239-44.
- 1058 36. Klein, C. and A. Westenberger, *Genetics of Parkinson's disease*. Cold Spring Harb Perspect Med, 2012. **2**(1): p. a008888.
- 1059 37. Starkstein, S., et al., *High rates of parkinsonism in adults with autism*. J Neurodev Disord, 2015. **7**(1): p. 29.
- 1060 38. Pahlman, M., et al., *Autism spectrum disorder and attention-deficit/hyperactivity disorder in children with cerebral palsy: results  
1061 from screening in a population-based group*. Eur Child Adolesc Psychiatry, 2020. **29**(11): p. 1569-1579.
- 1062 39. Riccio, M.P., et al., *Dystonic Movement Disorder as Symptom of Catatonia in Autism Spectrum Disorder*. Case Rep Psychiatry,  
1063 2020. **2020**: p. 8832075.
- 1064 40. Dell'Osso, L., et al., *Autism spectrum in patients with schizophrenia: correlations with real-life functioning, resilience, and coping  
1065 styles*. CNS Spectr, 2021: p. 1-11.
- 1066 41. Gecz, J. and J.G. Berry, *Cerebral palsy with autism and ADHD: time to pay attention*. Dev Med Child Neurol, 2021. **63**(3): p.  
1067 247-248.
- 1068 42. Ghaziuddin, M. and N. Ghaziuddin, *Bipolar Disorder and Psychosis in Autism*. Psychiatr Clin North Am, 2021. **44**(1): p. 1-9.
- 1069 43. Pan, P.Y., et al., *Neurological disorders in autism: A systematic review and meta-analysis*. Autism, 2021. **25**(3): p. 812-830.
- 1070 44. Bermperidis, T., et al., *Optimal time lags from causal prediction model help stratify and forecast nervous system pathology*. Sci Rep,  
1071 2021. **11**(1): p. 20904.
- 1072 45. Torres, E.B., P. Yanovich, and D.N. Metaxas, *Give spontaneity and self-discovery a chance in ASD: spontaneous peripheral limb  
1073 variability as a proxy to evoke centrally driven intentional acts*. Front Integr Neurosci, 2013. **7**: p. 46.
- 1074 46. Wu, D., et al., *A Biomarker Characterizing Neurodevelopment with applications in Autism*. Sci Rep, 2018. **8**(1): p. 614.
- 1075 47. Caballero, C., et al., *Characterization of Noise Signatures of Involuntary Head Motion in the Autism Brain Imaging Data Exchange  
1076 Repository*. Front Integr Neurosci, 2018. **12**: p. 7.
- 1077 48. Caballero, C., S. Mistry, and E.B. Torres, *Age-Dependent Statistical Changes of Involuntary Head Motion Signatures Across  
1078 Autism and Controls of the ABIDE Repository*. Front. Integr. Neurosci., 2020. **14**(23): p. 1-14.
- 1079 49. Consortium, G.T., *The GTEx Consortium atlas of genetic regulatory effects across human tissues*. Science, 2020. **369**(6509): p.  
1080 1318-1330.
- 1081 50. Torres, E.B., et al., *Toward Precision Psychiatry: Statistical Platform for the Personalized Characterization of Natural Behaviors*.  
1082 Front Neurol, 2016. **7**: p. 8.
- 1083 51. Haruvi-Lamdan, N., D. Horesh, and O. Golan, *PTSD and autism spectrum disorder: Co-morbidity, gaps in research, and potential  
1084 shared mechanisms*. Psychol Trauma, 2018. **10**(3): p. 290-299.
- 1085 52. Pettersson, E., et al., *Genetic influences on eight psychiatric disorders based on family data of 4 408 646 full and half-siblings, and  
1086 genetic data of 333 748 cases and controls*. Psychol Med, 2019. **49**(7): p. 1166-1173.
- 1087 53. Monge, G., *Memoire sur la theorie des deblais et des remblais.*, in *Histoire de l' Academie Royale des Science; avec les Memoires de  
1088 Mathematique et de Physique*; . 1781, De L'imprimerie Royale: Paris, France.
- 1089 54. Rubner, Y., C. Tomasi, and L.J. Guibas. *Metric for Distributions with Applications to Image Databases*. in *Proceedings of the ICCV*.  
1090 1998. Bombay, India.

- 1091 55. Stolfi, J. and L.J. Guibas, *The earth mover's distance as a metric for image retrieval*. Int. J. Comput. Vis., 2000. **40**: p. 99-121.
- 1092 56. Hoover, D.W. and J. Kaufman, *Adverse childhood experiences in children with autism spectrum disorder*. Curr Opin Psychiatry, 1093 2018. **31**(2): p. 128-132.
- 1094 57. Stack, A. and J. Lucyshyn, *Autism Spectrum Disorder and the Experience of Traumatic Events: Review of the Current Literature to 1095 Inform Modifications to a Treatment Model for Children with Autism*. J Autism Dev Disord, 2019. **49**(4): p. 1613-1625.
- 1096 58. Yousef Yengej, F.A., et al., *The development of offspring from mothers with systemic lupus erythematosus. A systematic review*. 1097 Autoimmun Rev, 2017. **16**(7): p. 701-711.
- 1098 59. Zhu, Z., et al., *Maternal Systemic Lupus Erythematosus, Rheumatoid Arthritis, and Risk for Autism Spectrum Disorders in 1099 Offspring: A Meta-analysis*. J Autism Dev Disord, 2020. **50**(8): p. 2852-2859.
- 1100 60. Blaxill, M., T. Rogers, and C. Nevison, *Autism Tsunami: the Impact of Rising Prevalence on the Societal Cost of Autism in the 1101 United States*. J Autism Dev Disord, 2021.
- 1102 61. Bradbury, K.R., et al., *Co-occurring Down Syndrome and Autism Spectrum Disorder: Cognitive, Adaptive, and Behavioral 1103 Characteristics*. J Autism Dev Disord, 2021.
- 1104 62. Salcedo-Arellano, M.J., et al., *Overlapping Molecular Pathways Leading to Autism Spectrum Disorders, Fragile X Syndrome, and 1105 Targeted Treatments*. Neurotherapeutics, 2021. **18**(1): p. 265-283.
- 1106 63. Tylee, D.S., et al., *Genetic correlations among psychiatric and immune-related phenotypes based on genome-wide association data*. Am 1107 J Med Genet B Neuropsychiatr Genet, 2018. **177**(7): p. 641-657.
- 1108 64. Bokadia, H., R. Rai, and E.B. Torres, *Digitized Autism Observation Diagnostic Schedule: Social Interactions beyond the Limits of 1109 the Naked Eye*. J Pers Med, 2020. **10**(4).
- 1110 65. Swanberg, S.E., et al., *Reciprocal co-regulation of EGR2 and MECP2 is disrupted in Rett syndrome and autism*. Hum Mol Genet, 1111 2009. **18**(3): p. 525-34.
- 1112 66. Platt, R.J., et al., *Chd8 Mutation Leads to Autistic-like Behaviors and Impaired Striatal Circuits*. Cell Rep, 2017. **19**(2): p. 335-350.
- 1113 67. Talkowski, M.E., et al., *Sequencing chromosomal abnormalities reveals neurodevelopmental loci that confer risk across diagnostic 1114 boundaries*. Cell, 2012. **149**(3): p. 525-37.
- 1115 68. Mondal, K., et al., *Excess variants in AFF2 detected by massively parallel sequencing of males with autism spectrum disorder*. Hum 1116 Mol Genet, 2012. **21**(19): p. 4356-64.
- 1117 69. Hiatt, S.M., et al., *Deleterious Variation in BRSK2 Associates with a Neurodevelopmental Disorder*. Am J Hum Genet, 2019. 1118 **104**(4): p. 701-708.
- 1119 70. Ciammola, A., et al., *X-linked Parkinsonism with Intellectual Disability caused by novel mutations and somatic mosaicism in 1120 RAB39B gene*. Parkinsonism Relat Disord, 2017. **44**: p. 142-146.
- 1121 71. Giannandrea, M., et al., *Mutations in the small GTPase gene RAB39B are responsible for X-linked mental retardation associated with 1122 autism, epilepsy, and macrocephaly*. Am J Hum Genet, 2010. **86**(2): p. 185-95.
- 1123 72. Lesage, S., et al., *Loss-of-function mutations in RAB39B are associated with typical early-onset Parkinson disease*. Neurol Genet, 1124 2015. **1**(1): p. e9.
- 1125 73. Wilson, G.R., et al., *Mutations in RAB39B cause X-linked intellectual disability and early-onset Parkinson disease with 1126 alpha-synuclein pathology*. Am J Hum Genet, 2014. **95**(6): p. 729-35.
- 1127 74. Hansen, F.H., et al., *Missense dopamine transporter mutations associate with adult parkinsonism and ADHD*. J Clin Invest, 2014. 1128 **124**(7): p. 3107-20.
- 1129 75. Hamilton, P.J., et al., *De novo mutation in the dopamine transporter gene associates dopamine dysfunction with autism spectrum 1130 disorder*. Mol Psychiatry, 2013. **18**(12): p. 1315-23.
- 1131 76. Doege, C.A., et al., *Early-stage epigenetic modification during somatic cell reprogramming by Parp1 and Tet2*. Nature, 2012. 1132 **488**(7413): p. 652-5.



- 1133 77. Guallar, D., et al., *RNA-dependent chromatin targeting of TET2 for endogenous retrovirus control in pluripotent stem cells*. Nat  
1134 Genet, 2018. **50**(3): p. 443-451.
- 1135 78. Shovlin, C.L., et al., *Adult onset immunodeficiency caused by inherited adenosine deaminase deficiency*. J Immunol, 1994. **153**(5): p.  
1136 2331-9.
- 1137 79. Hla, T. and K. Neilson, *Human cyclooxygenase-2 cDNA*. Proc Natl Acad Sci U S A, 1992. **89**(16): p. 7384-8.
- 1138 80. Samad, T.A., et al., *Interleukin-1beta-mediated induction of Cox-2 in the CNS contributes to inflammatory pain hypersensitivity*.  
1139 Nature, 2001. **410**(6827): p. 471-5.
- 1140 81. Tamura, S., et al., *Foxp1 gene expression in projection neurons of the mouse striatum*. Neuroscience, 2004. **124**(2): p. 261-7.
- 1141 82. Hisaoka, T., et al., *The forkhead transcription factors, Foxp1 and Foxp2, identify different subpopulations of projection neurons in the*  
1142 *mouse cerebral cortex*. Neuroscience, 2010. **166**(2): p. 551-63.
- 1143 83. Precious, S.V., et al., *FoxP1 marks medium spiny neurons from precursors to maturity and is required for their differentiation*. Exp  
1144 Neurol, 2016. **282**: p. 9-18.
- 1145 84. Peng, J., Y. Zhou, and K. Wang, *Multiplex gene and phenotype network to characterize shared genetic pathways of epilepsy and*  
1146 *autism*. Sci Rep, 2021. **11**(1): p. 952.
- 1147 85. Liao, X. and Y. Li, *Genetic associations between voltage-gated calcium channels and autism spectrum disorder: a systematic review*.  
1148 Mol Brain, 2020. **13**(1): p. 96.
- 1149 86. Yoshino, Y., B. Roy, and Y. Dwivedi, *Altered miRNA landscape of the anterior cingulate cortex is associated with potential loss of*  
1150 *key neuronal functions in depressed brain*. Eur Neuropsychopharmacol, 2020. **40**: p. 70-84.
- 1151 87. Bottema-Beutel, K., et al., *Adverse event reporting in intervention research for young autistic children*. Autism, 2021. **25**(2): p.  
1152 322-335.
- 1153 88. Thompson-Hodgetts, S., et al., *Helpful or harmful? A scoping review of perceptions and outcomes of autism diagnostic disclosure to*  
1154 *others*. Research in Autism Spectrum Disorders, 2020. **77**: p. 101598.
- 1155 89. Chen, Y.Y., Y.L. Chen, and S.S. Gau, *Suicidality in Children with Elevated Autistic Traits*. Autism Res, 2020. **13**(10): p.  
1156 1811-1821.
- 1157 90. Costa, A.P., C. Loor, and G. Steffgen, *Suicidality in Adults with Autism Spectrum Disorder: The Role of Depressive*  
1158 *Symptomatology, Alexithymia, and Antidepressants*. J Autism Dev Disord, 2020. **50**(10): p. 3585-3597.
- 1159 91. Hand, B.N., T.W. Benevides, and H.J. Carretta, *Suicidal Ideation and Self-inflicted Injury in Medicare Enrolled Autistic Adults*  
1160 *With and Without Co-occurring Intellectual Disability*. J Autism Dev Disord, 2020. **50**(10): p. 3489-3495.
- 1161 92. Broderick, A.A. and R. Roscigno, *Autism, Inc.: The Autism Industrial Complex*. Journal of Disability Studies in Education,  
1162 2021: p. 1-25.
- 1163 93. Bottema-Beutel, K., et al., *Research Review: Conflicts of Interest (COIs) in autism early intervention research - a meta-analysis of*  
1164 *COI influences on intervention effects*. J Child Psychol Psychiatry, 2021. **62**(1): p. 5-15.
- 1165 94. Dawson, M. and S. Fletcher-Watson, *Commentary: What conflicts of interest tell us about autism intervention research-a*  
1166 *commentary on Bottema-Beutel et al. (2020)*. J Child Psychol Psychiatry, 2021. **62**(1): p. 16-18.
- 1167 95. Sandbank, M., et al., *Project AIM: Autism intervention meta-analysis for studies of young children*. Psychol Bull, 2020. **146**(1): p.  
1168 1-29.
- 1169 96. Carroll, L., et al., *Autism Spectrum Disorders: Multiple Routes to, and Multiple Consequences of, Abnormal Synaptic Function and*  
1170 *Connectivity*. Neuroscientist, 2021. **27**(1): p. 10-29.
- 1171 97. Torres, E.B., *Objective biometric methods for the diagnosis and treatment of nervous system disorders*. 2018, London: Academic  
1172 Press. x, 568 pages.

A

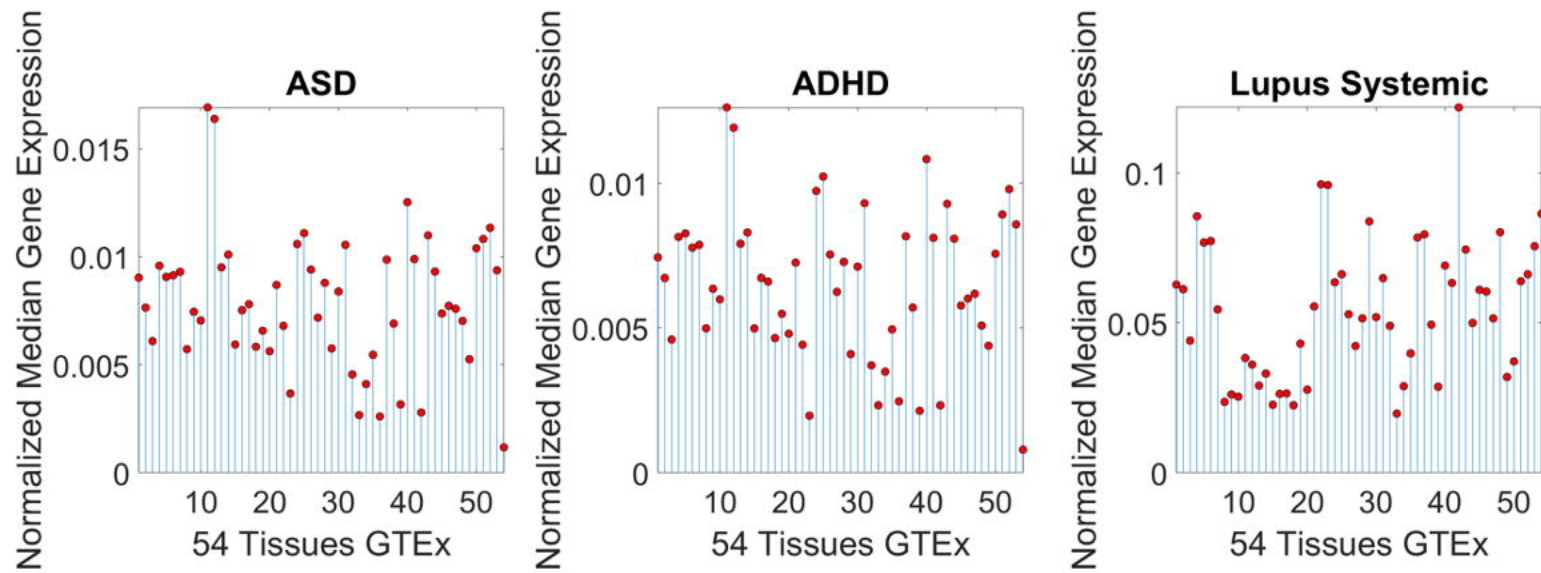

B

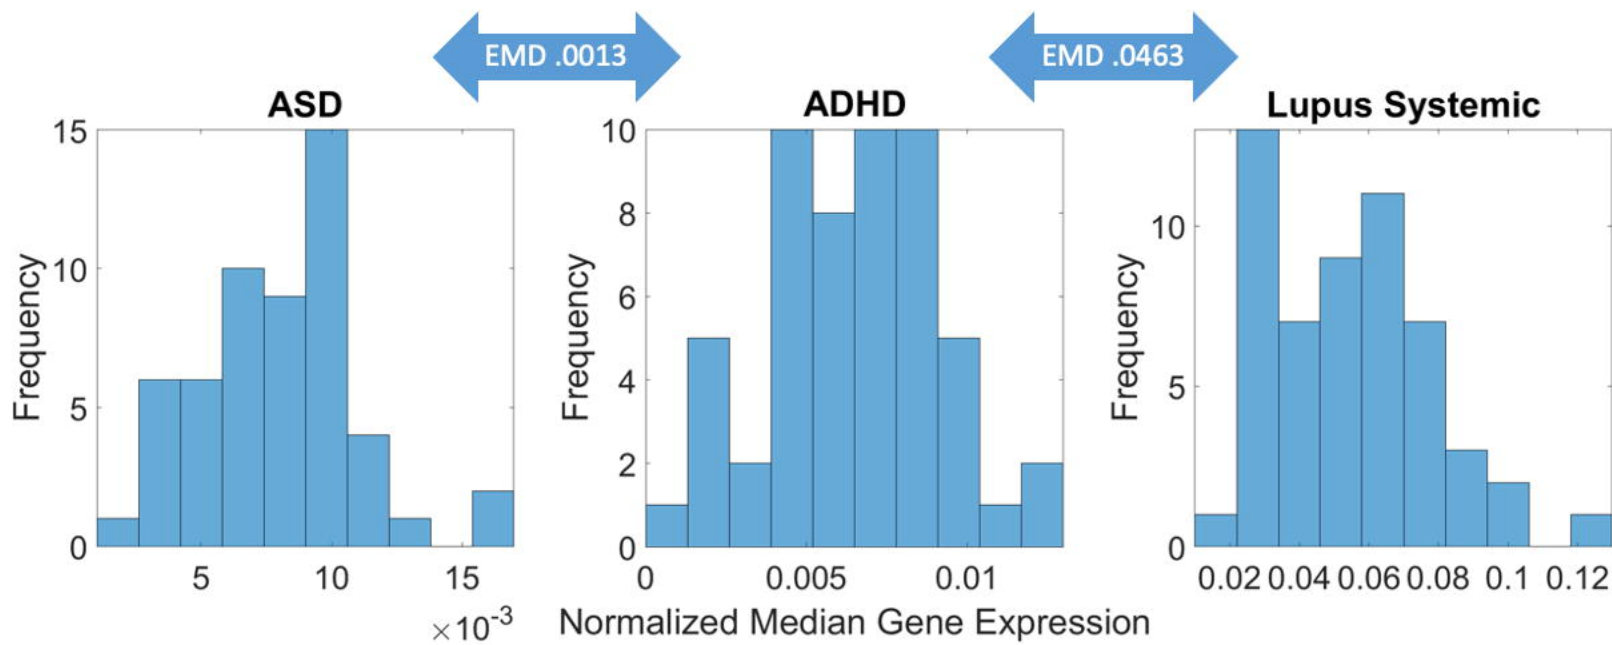

A

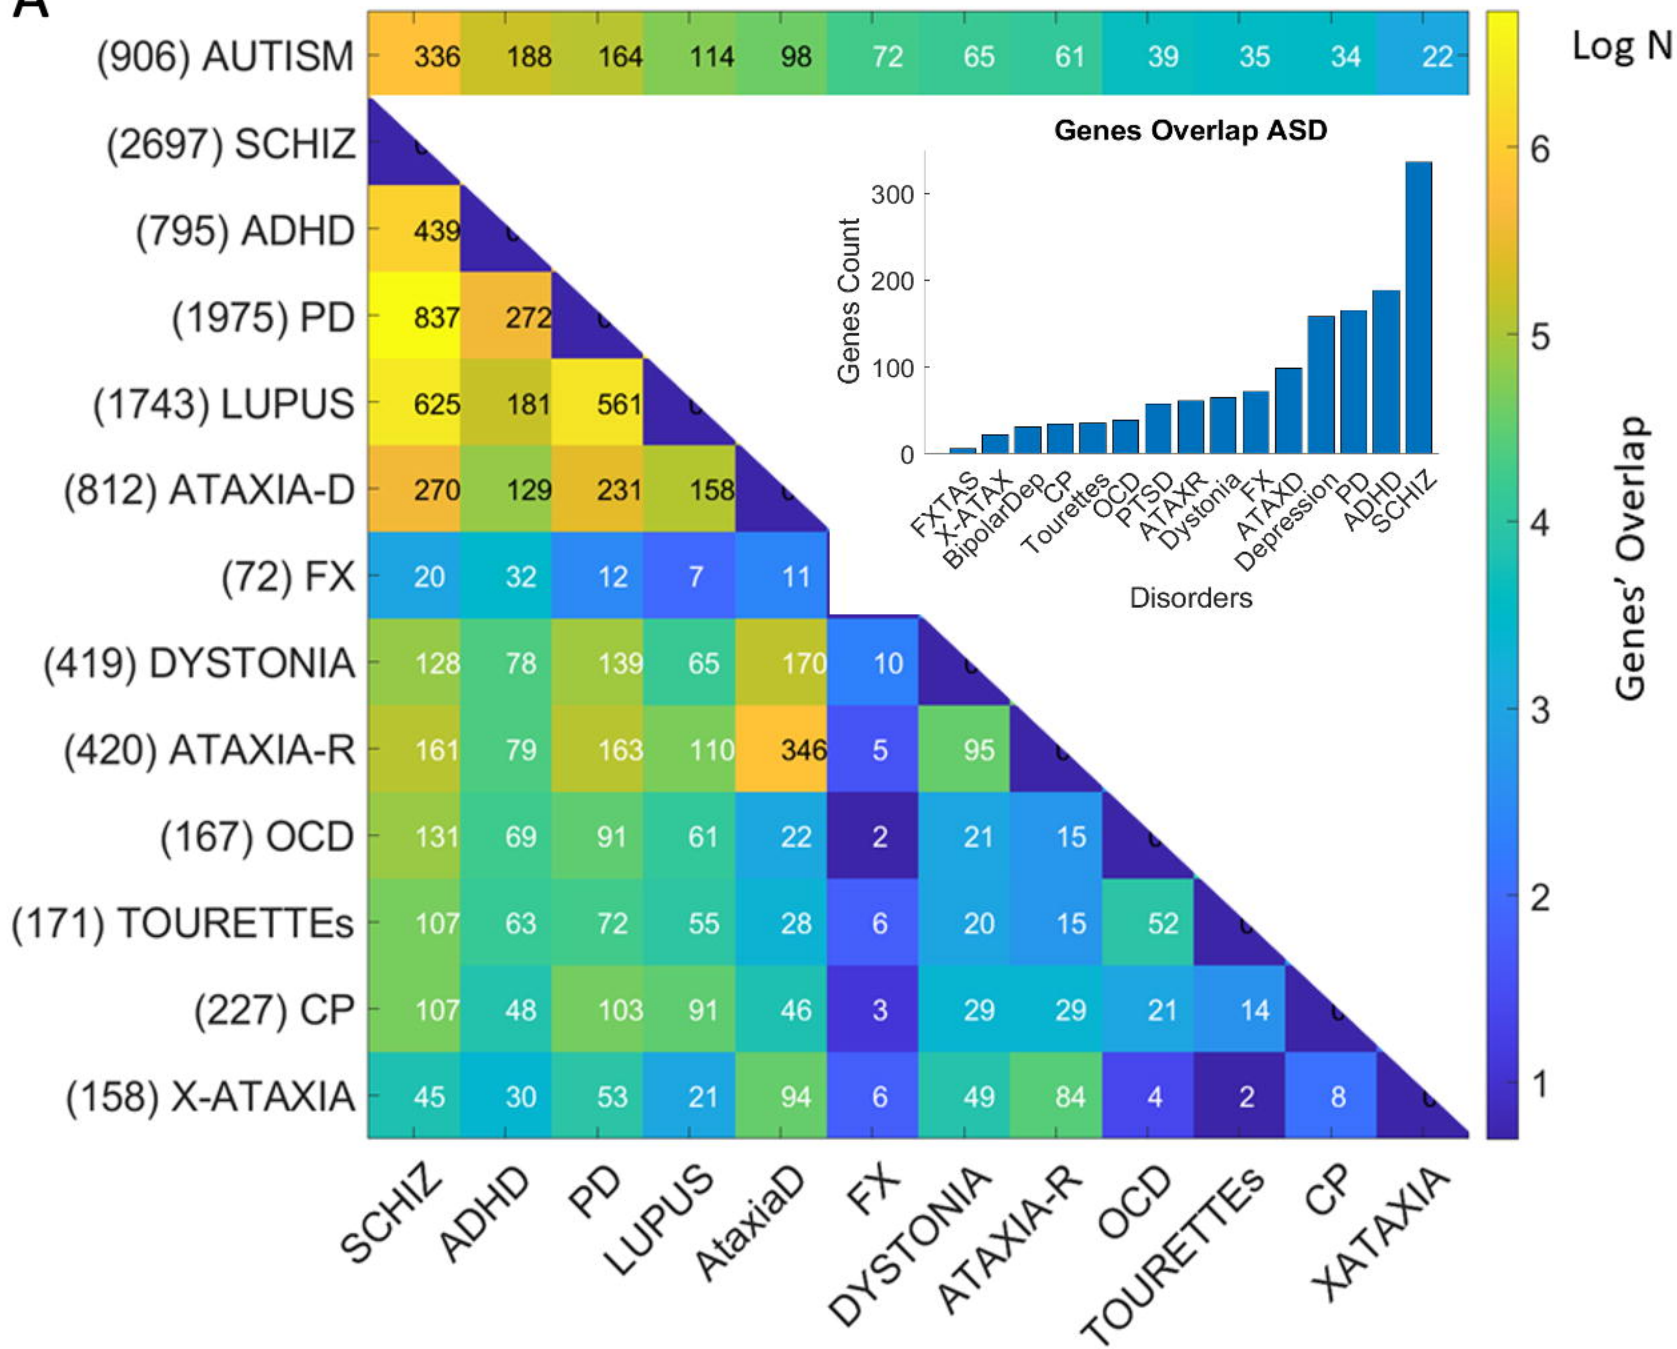

B

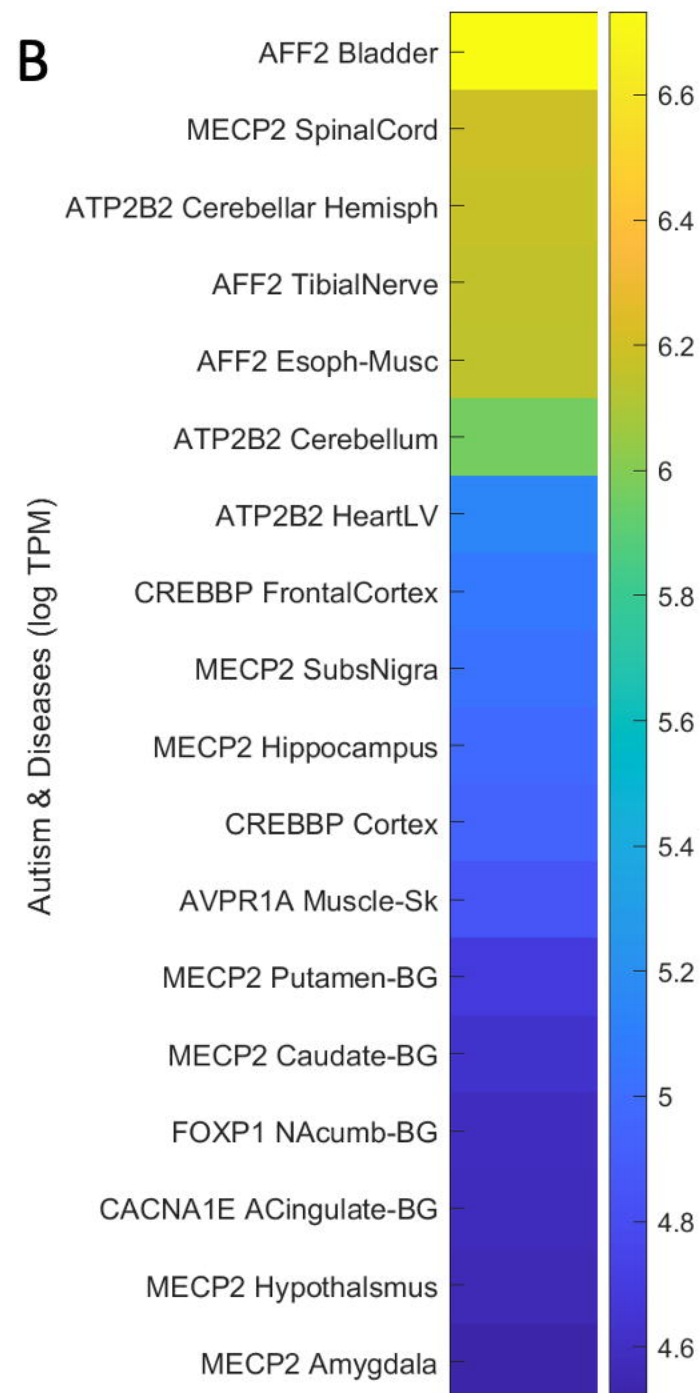

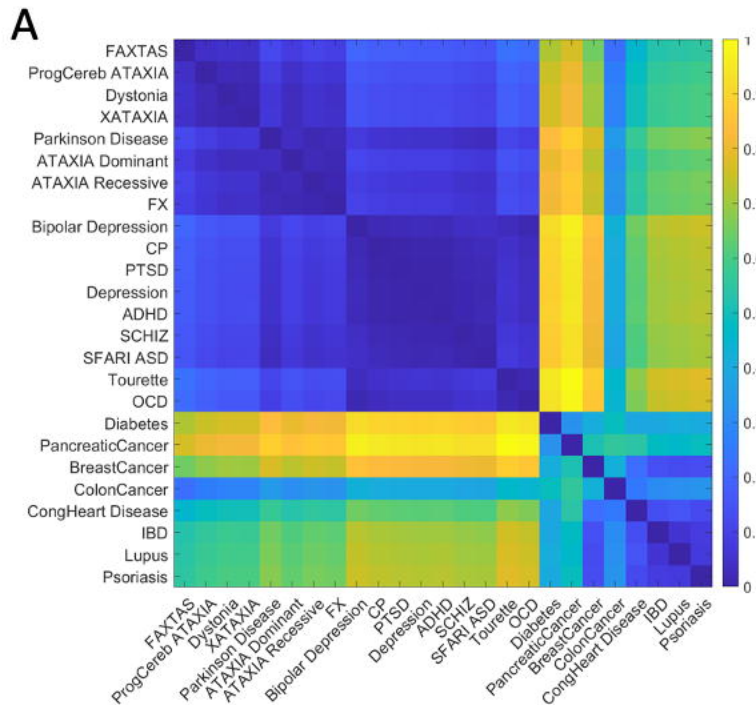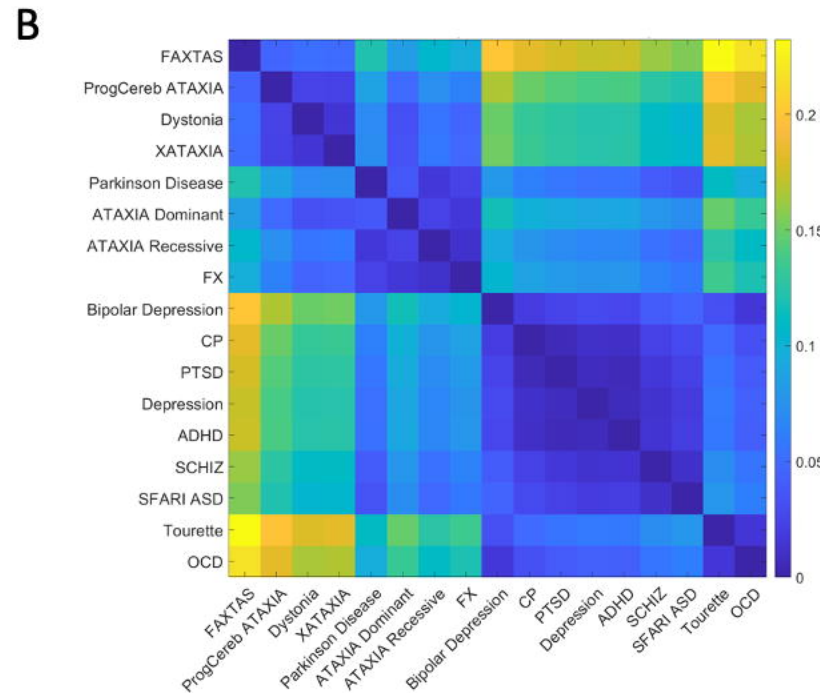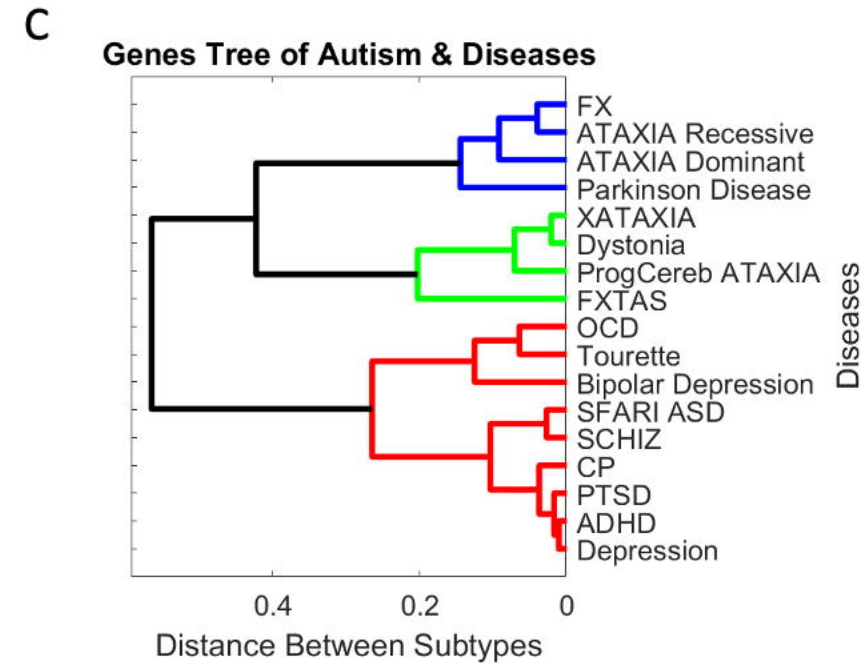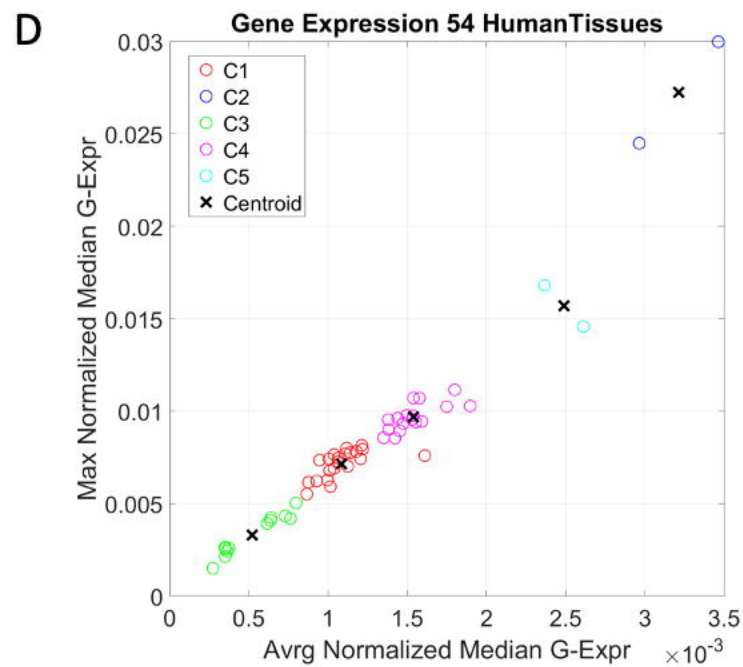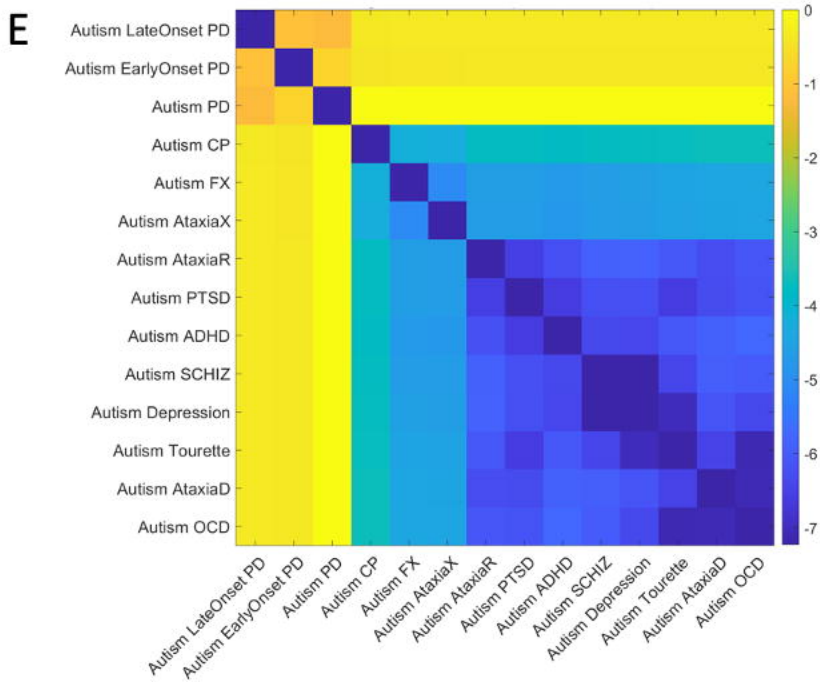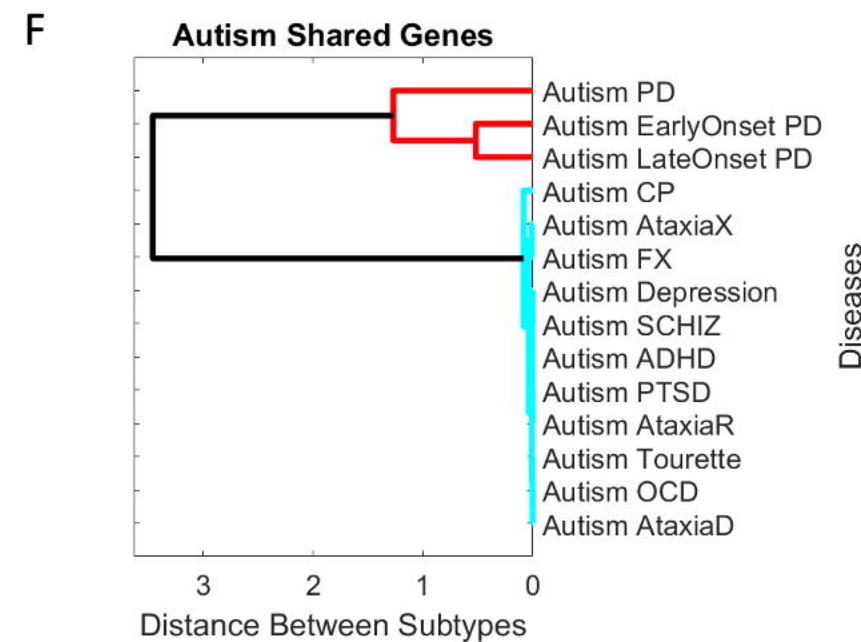

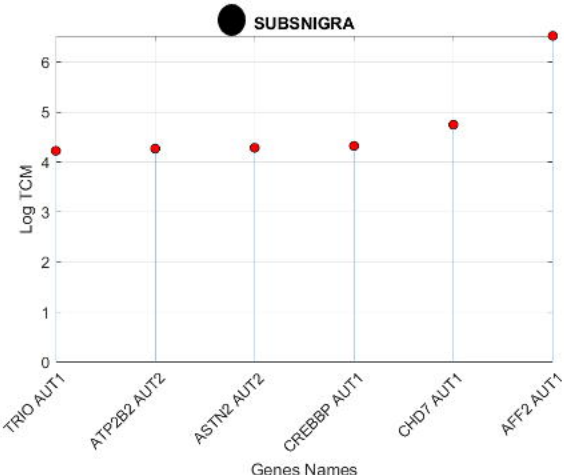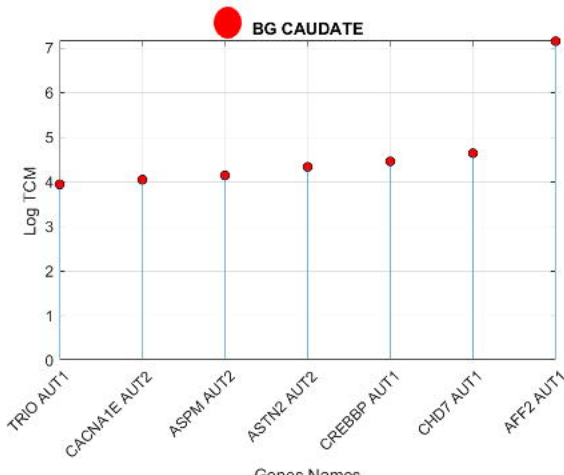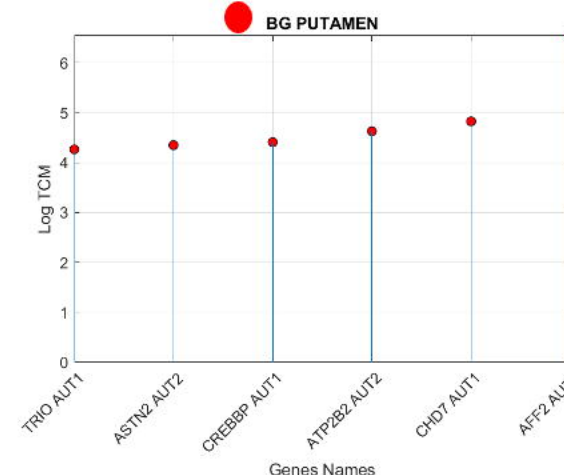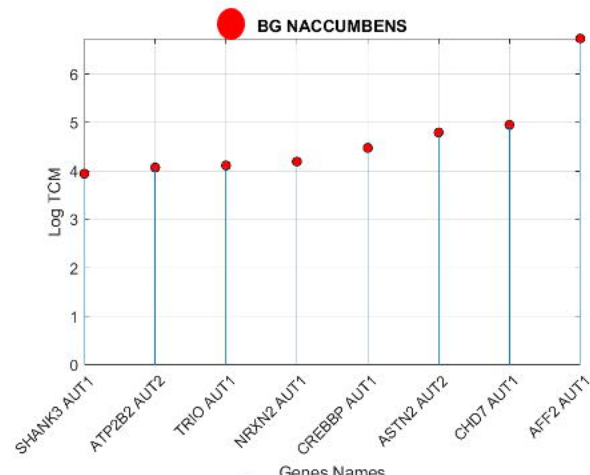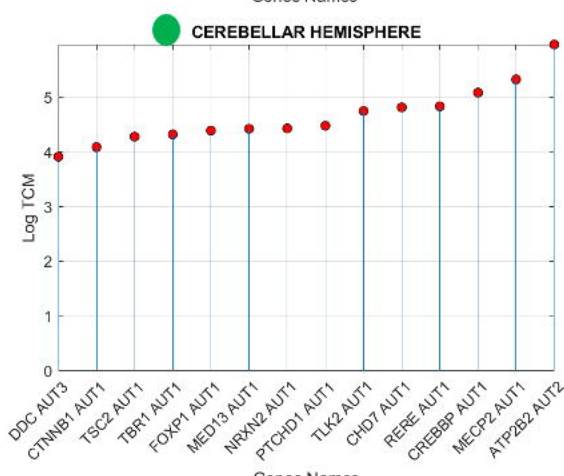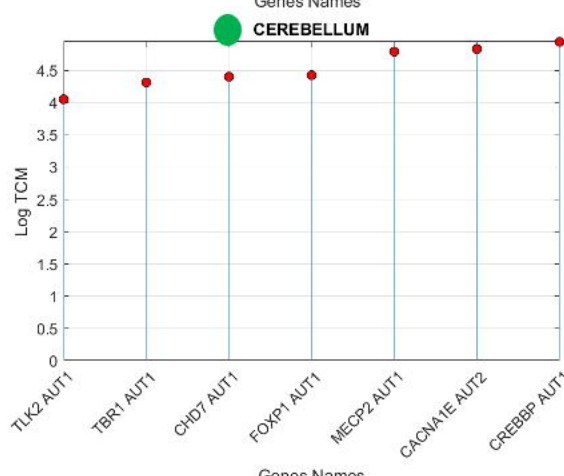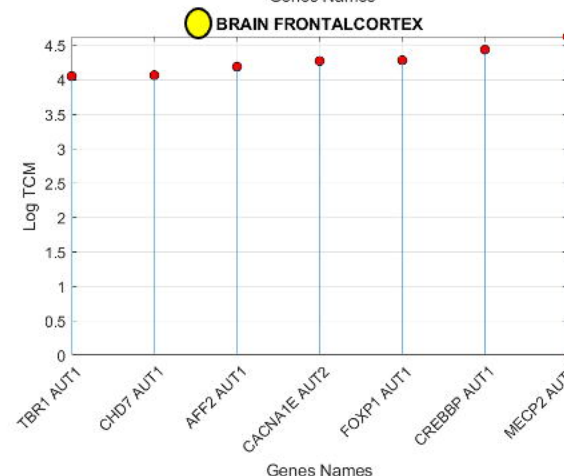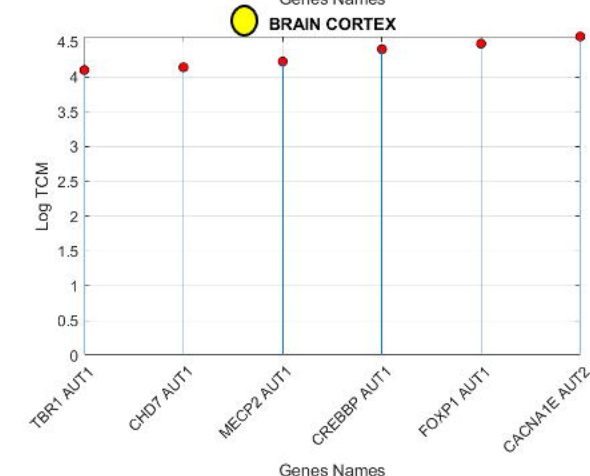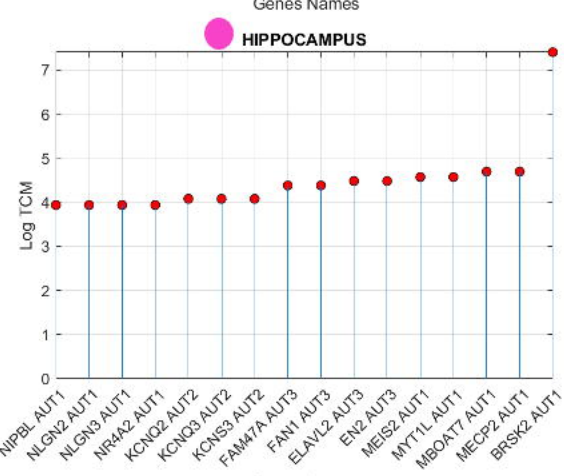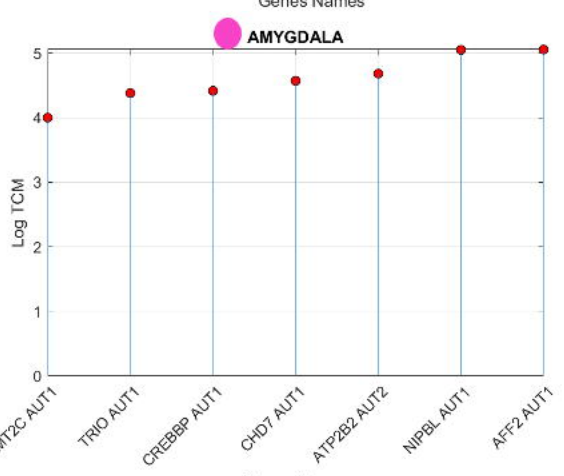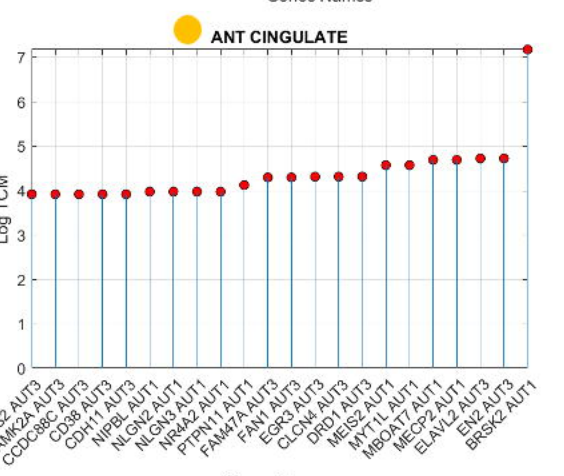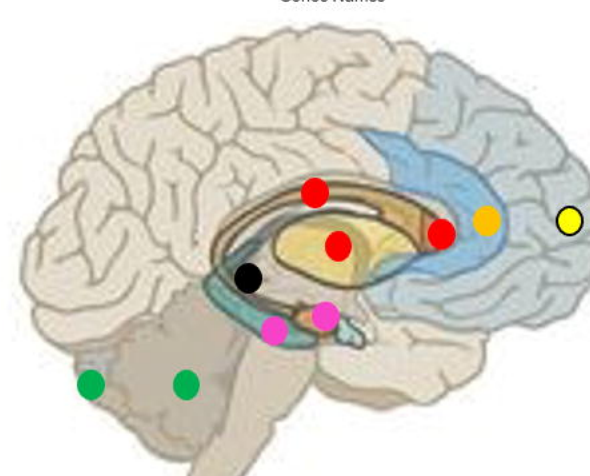

A

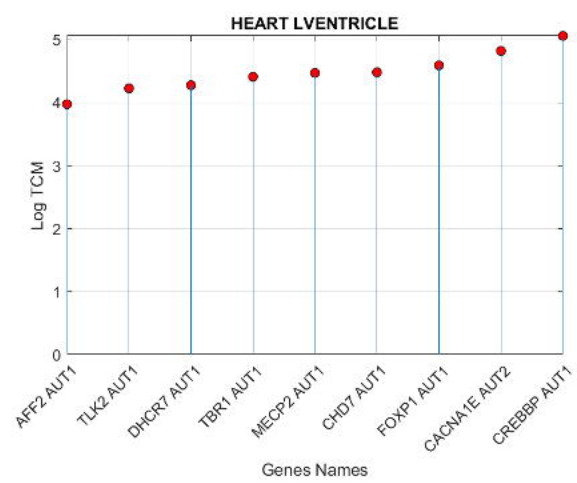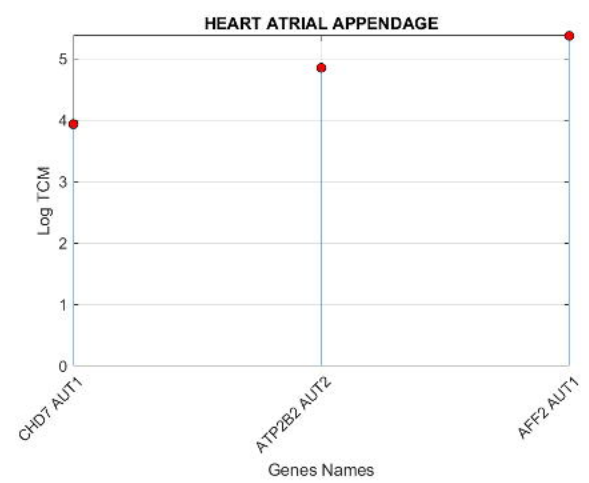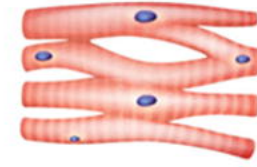

**Cardiac muscle**  
Striated  
Involuntary

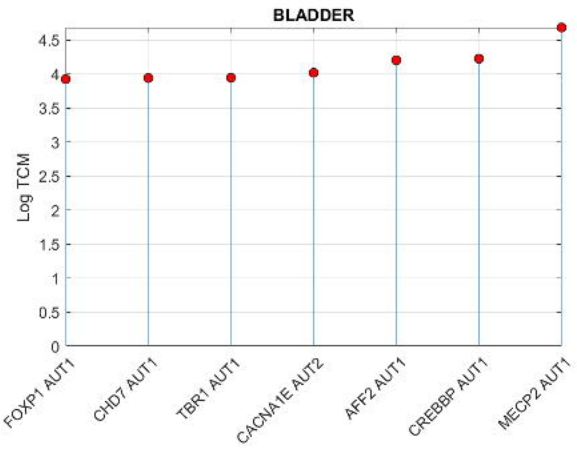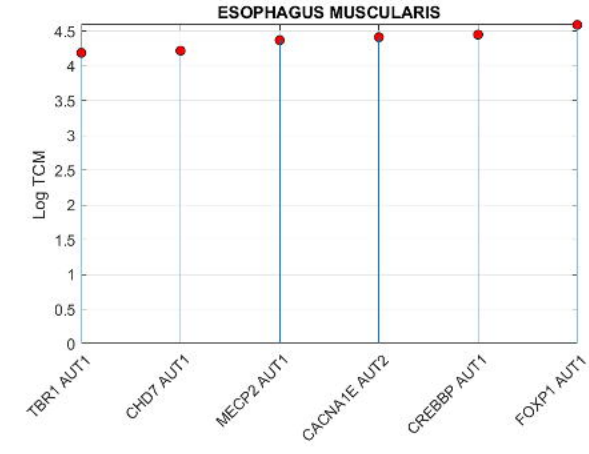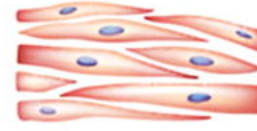

**Smooth muscle**  
Non Striated  
Involuntary

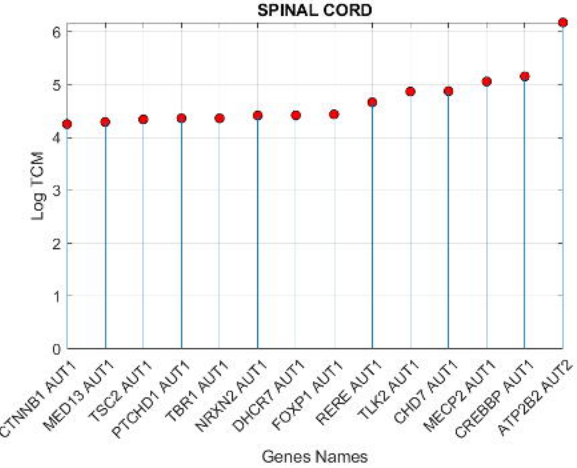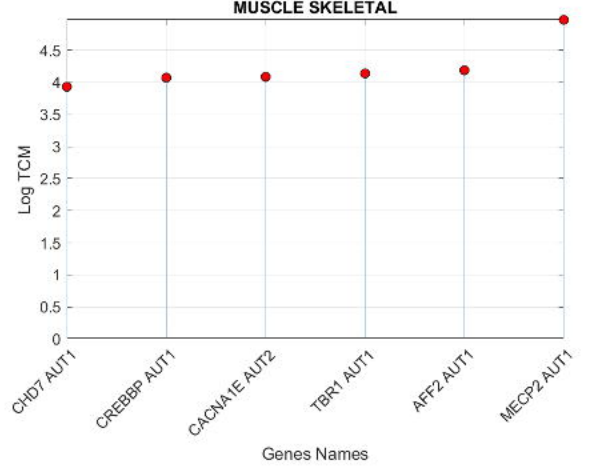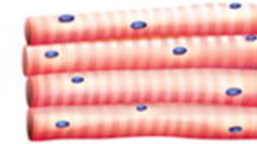

**Skeletal muscle**  
Striated  
Voluntary

B

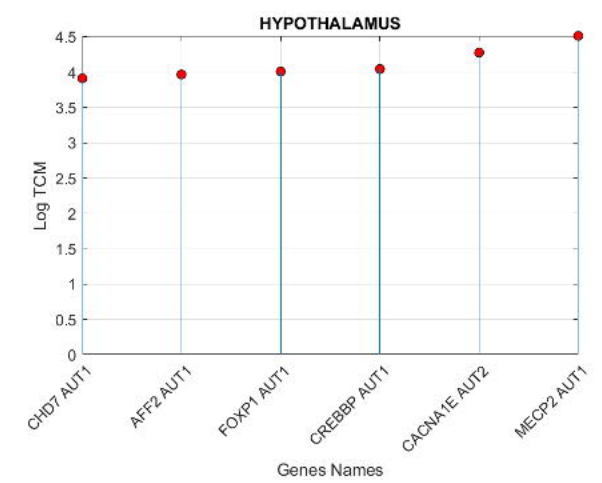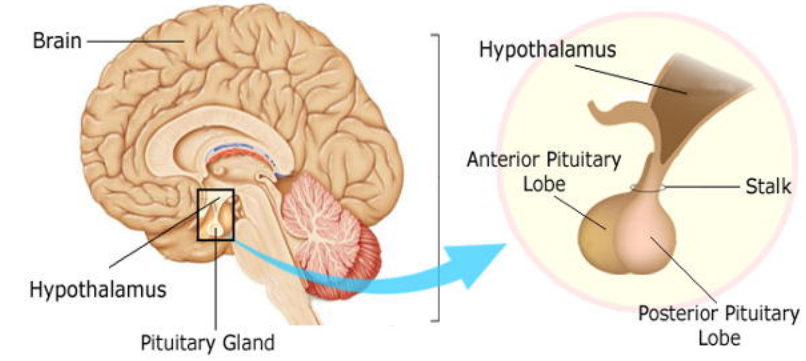

[www.whythyroid.com](http://www.whythyroid.com)

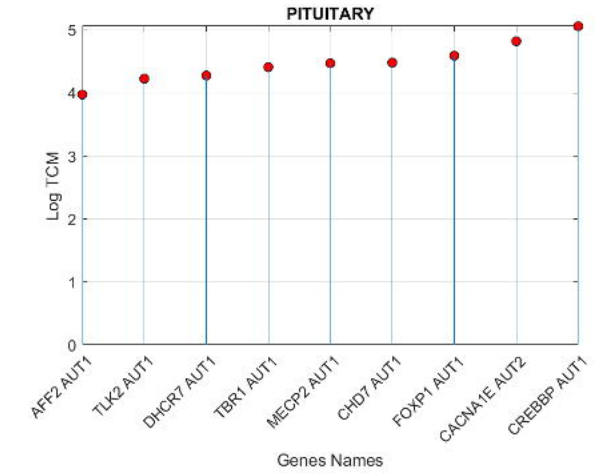

**A**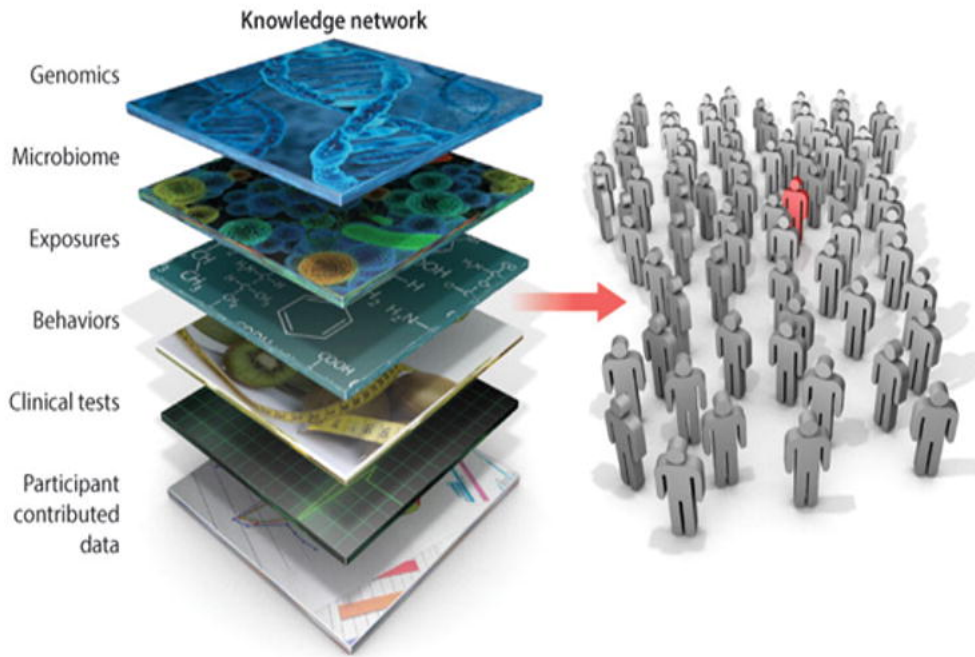

From [Science Translational Medicine 12 Aug 2015 Vol.7, issue 300, pp300ps17  
DOI:10.1126/scitrnaslmed.aaa9970]. Reprinted with permission from AAAS

**B**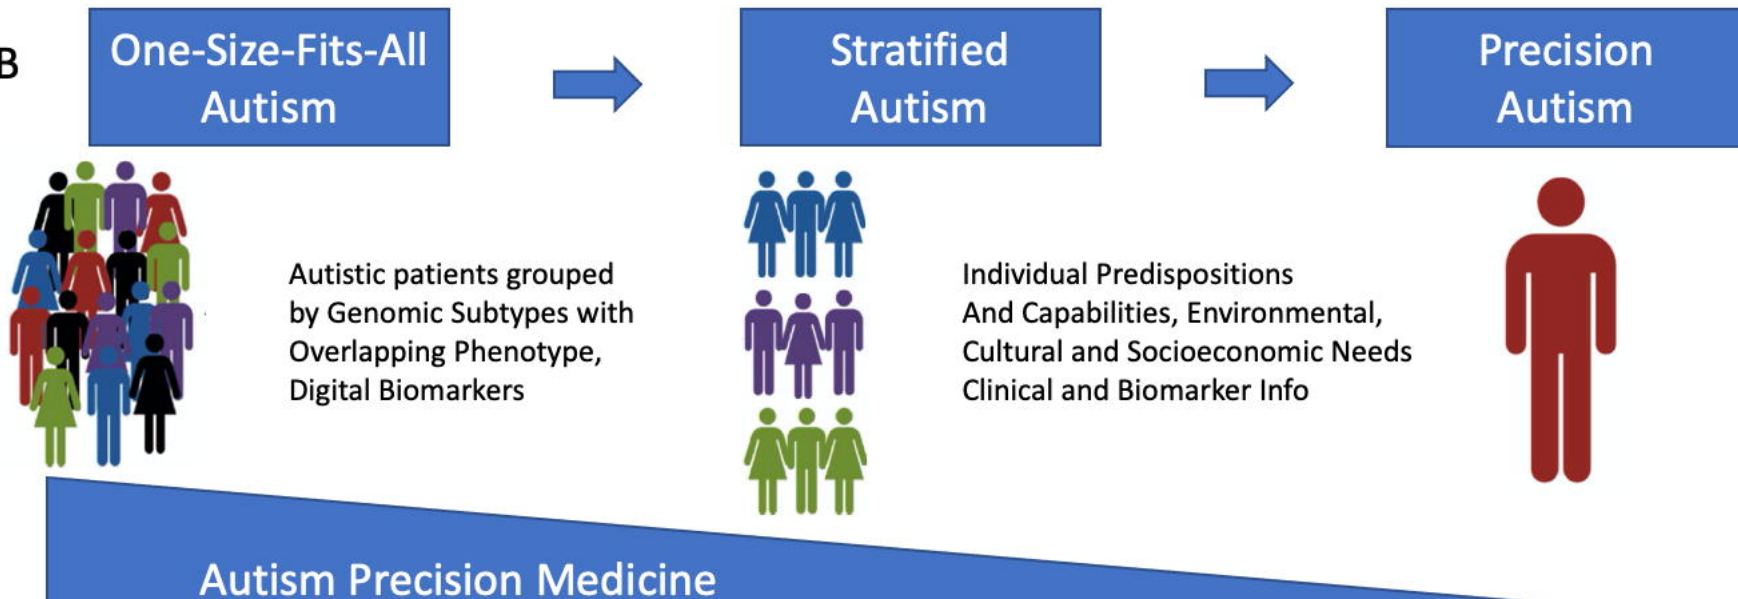

**A**

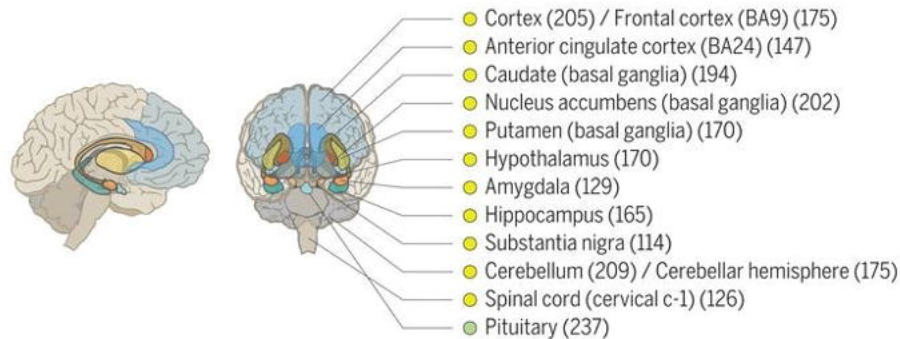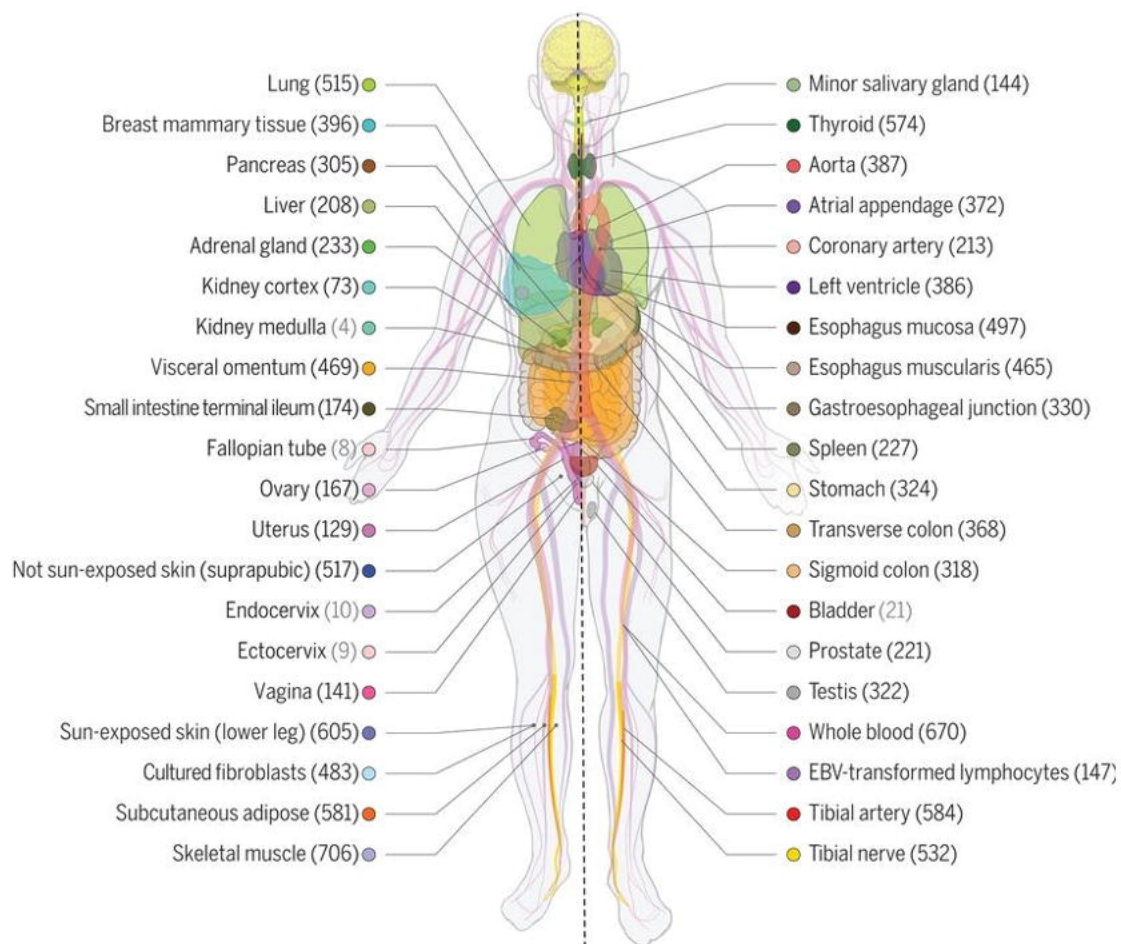

**B**

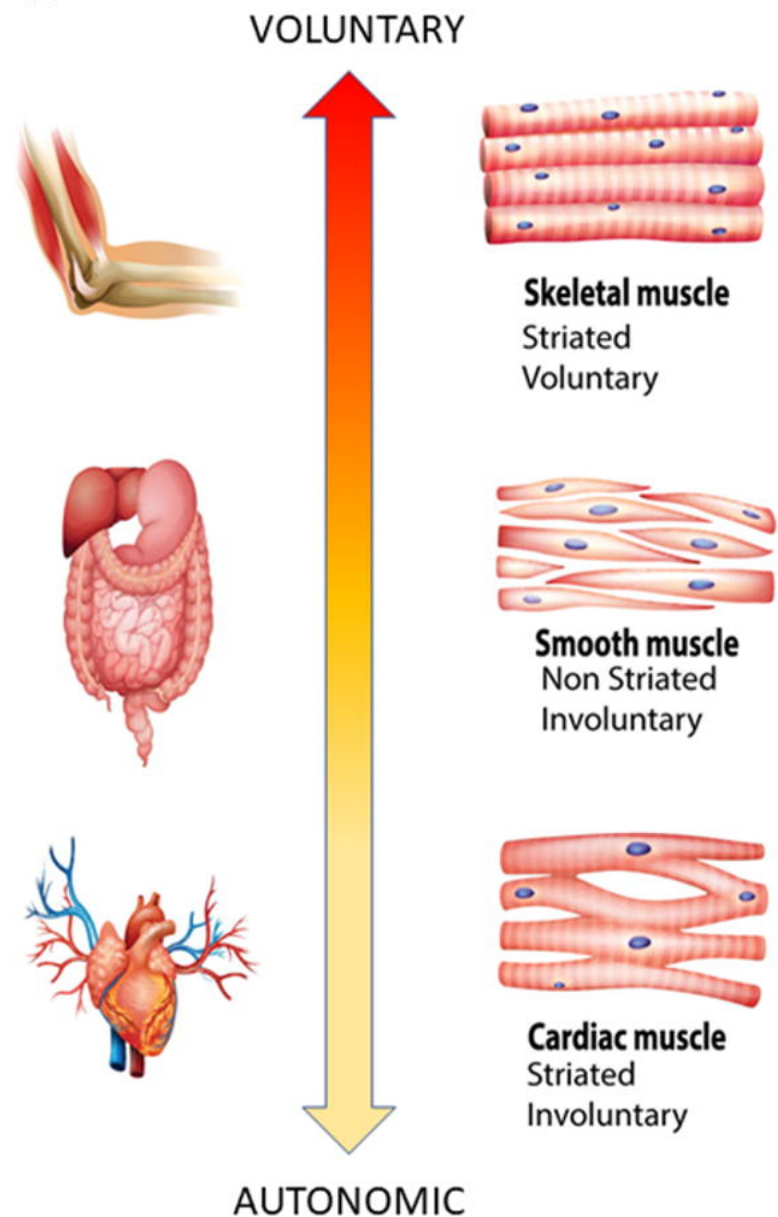

Source: https://www.biorxiv.org/content/10.1101/2021.07.28.454081v2.full.pdf
